# Supplementary material for: Metal-free molecular iodine-catalyzed direct sulfonylation of pyrazolones with sodium sulfinates leading to sulfonated pyrazoles at room temperature
Source: Royal Society of Chemistry journal article supplement (doi:10.1039/c6qo00403b), 2016-10-10

## Supplementary Information

### **Metal-free molecular iodine-catalyzed direct sulfonylation of pyrazolones with sodium sulfinates leading to sulfonated pyrazoles at room temperature**

Wei Wei,\* Huanhuan Cui, Daoshan Yang, Xiaoxia Liu, Chenglong He, Shicui Dai, Hua Wang\*

*The Key Laboratory of Life-Organic Analysis and Key Laboratory of Pharmaceutical Intermediates and Analysis of Natural Medicine, School of Chemistry and Chemical Engineering, Qufu Normal University, Qufu 273165, Shandong, China.*

\*Phone: +86 537 4458317; Fax: +86 537 4458317. E-mail: weiweiqfnu@163.com; huawang\_qfnu@126.com, website: <http://wang.qfnu.edu.cn>.

## Contents

|                                                                                                                                                 |         |
|-------------------------------------------------------------------------------------------------------------------------------------------------|---------|
| 1. General information .....                                                                                                                    | S2      |
| 2. General procedure for molecular iodine-catalyzed sulfonylation of pyrazolones<br>with sodium sulfinates leading to sulfonated pyrazoles..... | S3      |
| 3. Preliminary mechanistic studies .....                                                                                                        | S3-S4   |
| 4. Characterization data of products <b>3aa–3la</b> .....                                                                                       | S4-S13  |
| 5. Copies of NMR spectra for compounds <b>3aa–3la</b> .....                                                                                     | S14-S37 |

## 1. General information

All commercially available reagent grade chemicals were purchased from Aldrich, Acros, Alfa Aesar and Beijing Ouhe Chemical Company and used as received without further purification unless otherwise stated. All solvents were freshly distilled and dried according to standard procedures.  $^1\text{H}$  NMR and  $^{13}\text{C}$  NMR spectra were recorded in  $\text{CDCl}_3$  on a Bruker Avance III 500 spectrometer with TMS as internal standard (500 MHz  $^1\text{H}$ , 125 MHz  $^{13}\text{C}$ ) at room temperature, the chemical shifts ( $\delta$ ) were expressed in ppm and  $J$  values were given in Hz. The following abbreviations are used to indicate the multiplicity: s (singlet), d (doublet), t (triplet), q (quartet), m (multiplet). All first order splitting patterns were assigned on the basis of the appearance of the multiplet. Splitting patterns that could not be easily interpreted were designated as multiplet (m or brs). Mass analyses and HRMS were obtained on a Finnigan-LCQDECA mass spectrometer and a Bruker Daltonics Bio-TOF-Q mass spectrometer by the ESI method, respectively. FT-IR spectrum was performed using a Thermo Fisher Nicolet IS5. Column chromatography was performed on silica gel (200 - 300 mesh).

## 2. General procedure for molecular iodine-catalyzed sulfonylation of pyrazolones with sodium sulfinates leading to sulfonated pyrazoles

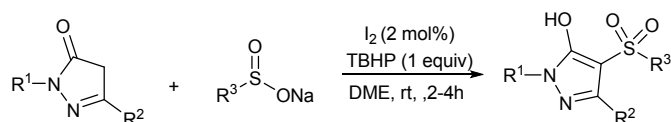

1,2-Dimethoxyethane (2 mL) was added to a mixture of pyrazolone **1** (0.25 mmol), sodium sulfinates **2** (0.5 mmol), I<sub>2</sub> (2 mol%), and TBHP (70% in water, 0.25 mmol) in a 25 mL round-bottomed flask at room temperature. The reaction vessel was allowed to stir at room temperature for 2-4h. After the reaction, the resulting mixture was concentrated under vacuum and the residue was purified by flash column chromatography using a mixture of dichloromethane and methanol as eluent to give the desired products.

## 3. Preliminary mechanistic studies

### 3.1 The model reaction was performed in the presence of TEMPO

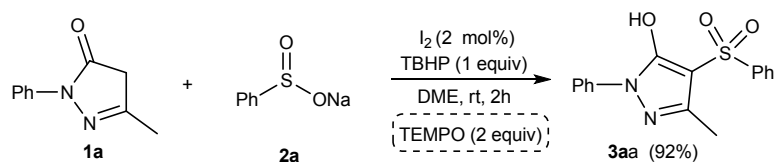

TEMPO (0.5 mmol) was added to a mixture of pyrazolone **1a** (0.25 mmol, 43.5 mg), sodium sulfinate **2a** (0.5 mmol, 82 mg), I<sub>2</sub> (2 mol%), TBHP (70% in water, 0.25 mmol) and 1,2-dimethoxyethane (2 mL) in a 25 mL round-bottomed flask at room temperature. The reaction vessel was allowed to stir at room temperature for 2h. After the reaction, the resulting mixture was concentrated under vacuum and the residue was purified by flash column chromatography using a mixture of dichloromethane and methanol as eluent to give the desired product **3aa** in 92% yield.

### 3.2 The model reaction was performed in the presence of BHT

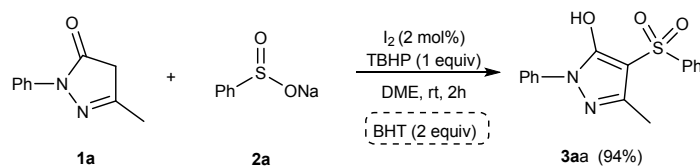

BHT (0.5 mmol, 110.2 mg) was added to a mixture of pyrazolone **1a** (0.25 mmol, 43.5 mg), sodium sulfinate **2a** (0.5 mmol, 82 mg),  $I_2$  (2 mol%) and 1,2-dimethoxyethane (2 mL) in a 25 mL round-bottomed flask at room temperature under air. The reaction vessel was allowed to stir at room temperature for 2h. After the reaction, the resulting mixture was concentrated under vacuum and the residue was purified by flash column chromatography using a mixture of dichloromethane and methanol as eluent to give the desired product **3aa** in 94% yield.

3.3 The reaction of pyrazolone **1a** and sodium sulfinate **2a** in the presence of  $I_2$  (1 equiv)

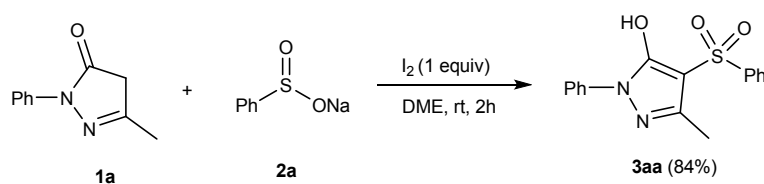

1,2-Dimethoxyethane (2 mL) was added to a mixture of pyrazolone **1** (0.25 mmol), sodium sulfinate **2** (0.5 mmol), and  $I_2$  (0.25 mmol) in a 25 mL round-bottomed flask at room temperature. The reaction vessel was allowed to stir at room temperature for 2h. After the reaction, the resulting mixture was concentrated under vacuum and the residue was purified by flash column chromatography using a mixture of dichloromethane and methanol as eluent to give the desired product **3aa** in 84% yield.

3.4 The reaction of pyrazolone **1a** and sulfonyl iodide **4b**

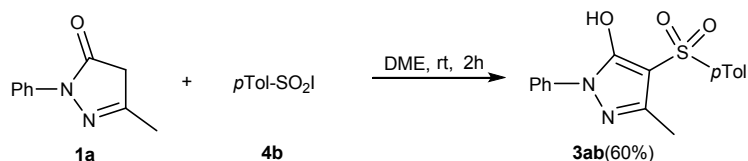

1,2-Dimethoxyethane (2 mL) was added to a mixture of pyrazolone **1a** (43.5mg,

0.25 mmol), sulfonyl iodide **4b** (141mg, 0.5 mmol) and DME (2 mL) in a 25 mL round-bottomed flask at room temperature under air. The reaction vessel was allowed to stir at room temperature for 2h. After the reaction, the resulting mixture was concentrated under vacuum and the residue was purified by flash column chromatography using a mixture of dichloromethane and methanol as eluent to give the desired product **3ab** in 60% yield.

## 5. Characterization data of products 3aa-3la

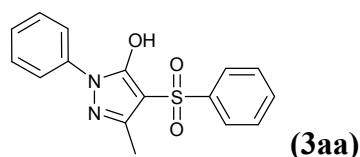

**3-methyl-1-phenyl-4-(phenylsulfonyl)-1H-pyrazol-5-ol**, Compound **3aa** was obtained in 96% yield according to the general procedure (2h). Yellow solid, mp: 210.2-212.1 °C. <sup>1</sup>H NMR (CD<sub>3</sub>OD, 500 MHz, ppm): δ 8.00 (d, *J* = 9.5 Hz, 2H), 7.84 (d, *J* = 9.7 Hz, 2H), 7.50 (t, *J* = 9.2 Hz, 1H), 7.42 (t, *J* = 7.3 Hz, 2H), 7.30 (t, *J* = 9.6 Hz, 2H), 7.12 (t, *J* = 9.1 Hz, 1H), 2.21 (s, 3H); <sup>13</sup>C NMR (CD<sub>3</sub>OD, 125 MHz, ppm): 160.9, 147.0, 144.4, 138.7, 132.1, 128.7, 128.3, 125.8, 124.8, 121.0, 96.3, 12.7. IR (KBr): OH 3429cm<sup>-1</sup>; HRMS (ESI) calcd for C<sub>16</sub>H<sub>14</sub>N<sub>2</sub>O<sub>3</sub>SNa (M + Na)<sup>+</sup> 337.0623, found 337.0616.

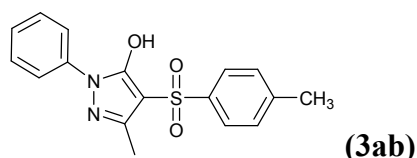

**3-methyl-1-phenyl-4-tosyl-1H-pyrazol-5-ol**, Compound **3ab** was obtained in 96% yield according to the general procedure (3h). Yellow solid, mp: 191.7-192.1 °C. <sup>1</sup>H NMR (CD<sub>3</sub>OD, 500 MHz, ppm): δ 7.87 (d, *J* = 8.3 Hz, 2H), 7.84 (d, *J* = 8.3 Hz, 2H), 7.30 (t, *J* = 6.3 Hz, 2H), 7.23 (d, *J* = 6.2 Hz, 2H), 7.13 (t, *J* = 6.8 Hz, 1H), 2.37 (s, 3H), 2.18 (s, 3H); <sup>13</sup>C NMR (CD<sub>3</sub>OD, 125 MHz, ppm): 161.6, 146.9, 143.0, 141.7, 139.2, 129.1, 128.2, 125.8, 124.4, 120.8, 95.5, 20.1, 12.7. IR (KBr): OH 3421cm<sup>-1</sup>; HRMS (ESI) calcd for C<sub>17</sub>H<sub>16</sub>N<sub>2</sub>O<sub>3</sub>SNa (M + Na)<sup>+</sup> 351.0779, found 351.0781.

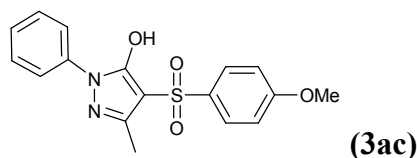

**4-(4-methoxyphenylsulfonyl)-3-methyl-1-phenyl-1H-pyrazol-5-ol**, Compound **3ac** was obtained in 85% yield according to the general procedure (2h). Yellow solid, mp: 191.5-192.8 °C. <sup>1</sup>H NMR (CD<sub>3</sub>OD, 500 MHz, ppm): δ 7.92 (d, *J* = 8.9 Hz, 2H), 7.85 (d, *J* = 7.7 Hz, 2H), 7.31 (brs, 2H), 7.14 (brs, 1H), 6.90 (brs, 2H), 3.81 (s, 3H), 2.17 (s, 3H); <sup>13</sup>C NMR (CD<sub>3</sub>OD, 125 MHz, ppm): 162.8, 161.4, 146.8, 139.1, 136.2, 128.2, 128.0, 124.5, 120.8, 113.7, 95.9, 54.8, 12.7. IR (KBr): OH 3438cm<sup>-1</sup>; HRMS (ESI) calcd for C<sub>17</sub>H<sub>16</sub>N<sub>2</sub>O<sub>4</sub>S (M + Na)<sup>+</sup> 367.0728, found 367.0732.

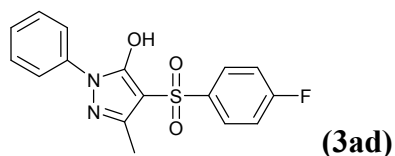

**4-(4-fluorophenylsulfonyl)-3-methyl-1-phenyl-1H-pyrazol-5-ol**, Compound **3ad** was obtained in 60% yield according to the general procedure (4h). Yellow solid, mp: 220.0-221.7 °C. <sup>1</sup>H NMR (CD<sub>3</sub>OD, 500 MHz, ppm): δ 8.05-8.02 (m, 2H), 7.85 (d, *J* = 7.9 Hz, 2H), 7.30 (brs, 2H), 7.13 (brs, 3H), 2.19 (s, 3H); <sup>13</sup>C NMR (CD<sub>3</sub>OD, 125 MHz, ppm): 164.8 (d, *J* = 252.2Hz), 161.8, 150.4, 146.8, 141.0, 139.2, 128.6 (d, *J* = 7.0 Hz), 128.1, 124.4, 120.8, 115.5 (d, *J* = 22.1 Hz), 95.0, 12.8. IR (KBr): OH 3421cm<sup>-1</sup>; HRMS (ESI) calcd for C<sub>16</sub>H<sub>13</sub>FN<sub>2</sub>O<sub>3</sub>SNa (M + Na)<sup>+</sup> 355.0529, found 355.0531.

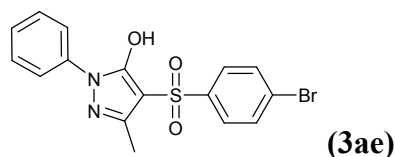

**4-(4-bromophenylsulfonyl)-3-methyl-1-phenyl-1H-pyrazol-5-ol**, Compound **3ae** was obtained in 90% yield according to the general procedure (4h). White solid, mp: 209.1-210.6 °C. <sup>1</sup>H NMR (CD<sub>3</sub>OD, 500 MHz, ppm): δ 7.88 (d, *J* = 8.6 Hz, 2H), 7.84 (d, *J* = 7.9 Hz, 2H), 7.57 (brs, 2H), 7.32 (brs, 2H), 7.14 (brs, 1H), 2.20 (s, 3H); <sup>13</sup>C NMR (CD<sub>3</sub>OD, 125 MHz, ppm): 161.7, 146.7, 143.8, 138.9, 131.8, 128.2, 127.5, 126.6, 124.6, 120.8, 94.6, 12.9. IR (KBr): OH 3420cm<sup>-1</sup>; HRMS (ESI) calcd for

$C_{16}H_{14}BrN_2O_3S$  ( $M + H$ )<sup>+</sup> 392.9909, found 392.9911.

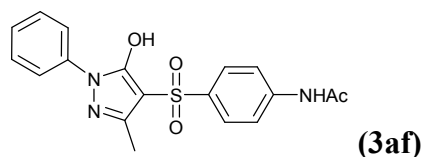

**N-(4-(5-hydroxy-3-methyl-1-phenyl-1H-pyrazol-4-ylsulfonyl)phenyl)acetamide,**

Compound **3af** was obtained in 89% yield according to the general procedure (3h). Yellow solid, 262.1-263.1°C. <sup>1</sup>H NMR (CD<sub>3</sub>OD, 500 MHz, ppm): δ 7.91 (d, *J* = 8.0 Hz, 2H), 7.82 (d, *J* = 6.0 Hz, 2H), 7.63 (d, *J* = 6.0 Hz, 2H), 7.31 (t, *J* = 7.2 Hz, 2H), 7.13 (t, *J* = 6.9 Hz, 1H), 2.22 (s, 3H), 2.14 (s, 3H); <sup>13</sup>C NMR (CD<sub>3</sub>OD, 125 MHz, ppm): 170.6, 161.5, 147.0, 142.3, 139.3, 139.1, 128.2, 126.8, 124.6, 120.9, 119.0, 96.2, 22.7, 12.9. IR(KBr): OH 3425cm<sup>-1</sup>; HRMS (ESI) calcd for C<sub>18</sub>H<sub>17</sub>N<sub>3</sub>O<sub>4</sub>SNa ( $M + Na$ )<sup>+</sup> 394.0837, found 394.0832.

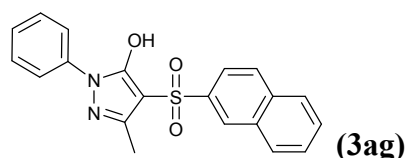

**3-methyl-4-(naphthalen-2-ylsulfonyl)-1-phenyl-1H-pyrazol-5-ol,** Compound **3ag**

was obtained in 88% yield (78.2 mg) according to the general procedure (4h). White solid, mp: 221.2-222.8 °C. <sup>1</sup>H NMR (CD<sub>3</sub>OD, 500 MHz, ppm): δ 8.54 (s, 1H), 7.94 (d, *J* = 8.4 Hz, 1H), 7.88 (d, *J* = 7.5 Hz, 2H), 7.78 (brs, 3H), 7.54 (t, *J* = 7.2 Hz, 1H), 7.48 (t, *J* = 6.6 Hz, 1H), 7.27 (brs, 2H), 7.09 (brs, 1H), 2.22 (s, 3H); <sup>13</sup>C NMR (CD<sub>3</sub>OD, 125 MHz, ppm): 162.0, 146.8, 141.3, 139.2, 134.6, 132.0, 128.8, 128.2, 127.4, 127.0, 126.3, 124.4, 121.6, 120.7, 95.1, 12.9. IR(KBr): OH 3394cm<sup>-1</sup>; HRMS (ESI) calcd for C<sub>20</sub>H<sub>16</sub>N<sub>2</sub>O<sub>3</sub>SNa ( $M + Na$ )<sup>+</sup> 387.0779, found 387.0774.

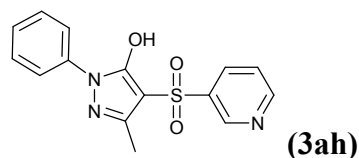

**3-methyl-1-phenyl-4-(pyridin-3-ylsulfonyl)-1H-pyrazol-5-ol,** Compound **3ah** was

obtained in 87% yield according to the general procedure (4h). Yellow solid, mp: 231.7-232.7 °C. <sup>1</sup>H NMR (CD<sub>3</sub>OD, 500 MHz, ppm): δ 9.11 (d, *J* = 2.0 Hz, 1H), 8.68 (s, 1H), 8.38 (d, *J* = 8.2 Hz, 1H), 7.83 (d, *J* = 8.2 Hz, 2H), 7.47 (brs, 1H), 7.30 (t, *J* =

7.0 Hz, 2H), 7.13 (t,  $J = 6.8$  Hz, 1H), 2.22 (s, 3H);  $^{13}\text{C}$  NMR ( $\text{CD}_3\text{OD}$ , 125 MHz, ppm): 162.0, 152.0, 146.8, 146.0, 141.7, 139.1, 134.2, 128.1, 124.5, 124.0, 120.8, 94.4, 12.9. IR(KBr): OH  $3429\text{cm}^{-1}$ ; HRMS (ESI) calcd for  $\text{C}_{15}\text{H}_{13}\text{N}_2\text{O}_3\text{SNa}$  ( $\text{M} + \text{Na}$ ) $^+$  338.0575, found 338.0577.

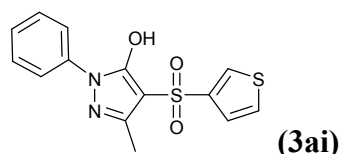

**3-methyl-1-phenyl-4-(thiophen-3-ylsulfonyl)-1H-pyrazol-5-ol**, Compound **3ai** was obtained in 66% yield according to the general procedure (4h). Yellow solid, mp: 210.7-212.6 °C.  $^1\text{H}$  NMR ( $\text{CD}_3\text{OD}$ , 500 MHz, ppm):  $\delta$  7.83 (d,  $J = 8.1$  Hz, 2H), 7.72 (dd,  $J_1 = 3.7$  Hz,  $J_2 = 1.1$  Hz, 1H), 7.68 (brs, 1H), 7.31 (t,  $J = 7.6$  Hz, 2H), 7.14 (t,  $J = 7.3$  Hz, 1H), 7.02 (brs, 1H), 2.26 (s, 3H);  $^{13}\text{C}$  NMR ( $\text{CD}_3\text{OD}$ , 125 MHz, ppm): 161.1, 146.9, 146.5, 139.0, 131.2, 130.5, 128.2, 127.0, 124.6, 120.9, 96.6, 12.8. IR(KBr): OH  $3360\text{cm}^{-1}$ ; HRMS (ESI) calcd for  $\text{C}_{14}\text{H}_{12}\text{N}_2\text{O}_3\text{S}_2\text{Na}$  ( $\text{M} + \text{Na}$ ) $^+$  343.0187, found 343.0189.

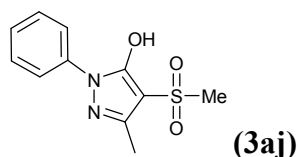

**(5-methyl-4-(methylsulfonyl)-2-phenyl-1H-pyrazol-3(2H)-one**, Compound **3aj** was obtained in 78% yield according to the general procedure (2h). White solid, mp: 241.3-242.9 °C.  $^1\text{H}$  NMR ( $\text{CD}_3\text{OD}$ , 500 MHz, ppm):  $\delta$  7.81 (d,  $J = 7.9$  Hz, 2H), 7.34 (t,  $J = 7.9$  Hz, 2H), 7.17 (t,  $J = 7.4$  Hz, 1H), 3.10 (s, 3H), 2.31 (s, 3H);  $^{13}\text{C}$  NMR ( $\text{CD}_3\text{OD}$ , 125 MHz, ppm): 161.4, 146.8, 139.0, 128.2, 124.8, 121.1, 95.3, 44.2, 20.9, 12.6. IR(KBr): OH  $3437\text{cm}^{-1}$ ; HRMS (ESI) calcd for  $\text{C}_{11}\text{H}_{12}\text{N}_2\text{O}_3\text{NaS}$  ( $\text{M} + \text{Na}$ ) $^+$  275.0466, found 275.0460.

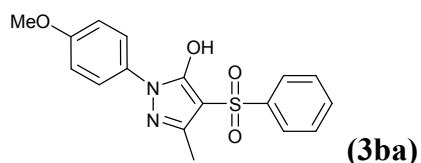

**1-(4-methoxyphenyl)-3-methyl-4-(phenylsulfonyl)-1H-pyrazol-5-ol**, Compound **3ba** was obtained in 65% yield according to the general procedure (4h). White solid,



mp: 206.7-270.6 °C. <sup>1</sup>H NMR (CD<sub>3</sub>OD, 500 MHz, ppm): δ 7.91 (d, *J* = 8.9 Hz, 2H), 7.85 (d, *J* = 7.7 Hz, 2H), 7.31 (brs, 2H), 7.13 (brs, 1H), 6.90 (brs, 2H), 3.81 (s, 3H), 2.17 (s, 3H); <sup>13</sup>C NMR (CD<sub>3</sub>OD, 125 MHz, ppm): 162.8, 161.4, 146.8, 139.1, 136.2, 128.2, 128.0, 124.5, 120.8, 113.7, 95.9, 54.8, 12.7. IR(KBr): OH 3455cm<sup>-1</sup>; HRMS (ESI) calcd for C<sub>17</sub>H<sub>16</sub>N<sub>2</sub>O<sub>4</sub>SNa (M + Na)<sup>+</sup> 367.0728, found 367.0731.

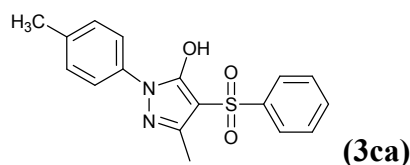

**3-methyl-4-(phenylsulfonyl)-1-p-tolyl-1H-pyrazol-5-ol**, Compound **3ca** was obtained in 98% yield according to the general procedure (2h). Yellow solid, mp: 222.1-222.7 °C. <sup>1</sup>H NMR (CD<sub>3</sub>OD, 500 MHz, ppm): δ 8.00 (d, *J* = 7.5 Hz, 2H), 7.68 (d, *J* = 8.1 Hz, 2H), 7.54 (t, *J* = 7.4 Hz, 1H), 7.44 (t, *J* = 6.6 Hz, 2H), 7.11 (d, *J* = 6.6 Hz, 2H), 2.31 (s, 3H), 2.18 (s, 3H); <sup>13</sup>C NMR (CD<sub>3</sub>OD, 125 MHz, ppm): 161.5, 146.6, 144.6, 136.7, 134.3, 132.0, 128.7, 128.6, 125.7, 121.0, 95.0, 19.6, 12.8. IR(KBr): OH 3421cm<sup>-1</sup>; HRMS (ESI) calcd for C<sub>17</sub>H<sub>16</sub>N<sub>2</sub>O<sub>3</sub>SNa (M + Na)<sup>+</sup> 351.0779, found 351.0783.

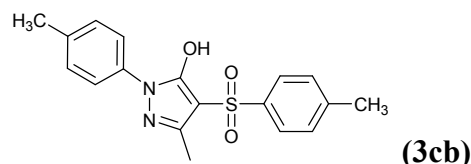

**3-methyl-1-p-tolyl-4-tosyl-1H-pyrazol-5-ol**, Compound **3cb** was obtained in 98% yield according to the general procedure (2h). White solid, mp: 229.7-230.8 °C. <sup>1</sup>H NMR (CD<sub>3</sub>OD, 500 MHz, ppm): δ 7.86 (d, *J* = 8.2 Hz, 2H), 7.67 (d, *J* = 7.4 Hz, 2H), 7.22 (brs, 2H), 7.12 (d, *J* = 7.6 Hz, 2H), 2.37 (s, 3H), 2.31 (s, 3H), 2.16 (s, 3H); <sup>13</sup>C NMR (CD<sub>3</sub>OD, 125 MHz, ppm): 161.4, 146.9, 143.3, 141.0, 136.6, 134.3, 129.1, 128.7, 125.9, 121.1, 95.0, 20.1, 19.6, 12.7. IR(KBr): OH 3438cm<sup>-1</sup>; HRMS (ESI) calcd for C<sub>18</sub>H<sub>18</sub>N<sub>2</sub>O<sub>3</sub>SNa (M + Na)<sup>+</sup> 365.0936, found 365.0937.

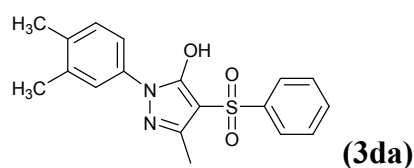

**1-(3,4-dimethylphenyl)-3-methyl-4-(phenylsulfonyl)-1H-pyrazol-5-ol**, Compound

**3da** was obtained in 82% yield according to the general procedure (2h). Yellow solid, mp: 211.7-212.8 °C. <sup>1</sup>H NMR (CD<sub>3</sub>OD, 500 MHz, ppm): δ 8.01 (d, *J* = 7.7 Hz, 2H), 7.55 (brs, 2H), 7.46 (brs, 3H), 7.07 (d, *J* = 7.9 Hz, 1H), 2.23 (s, 3H), 2.21 (s, 6H); <sup>13</sup>C NMR (CD<sub>3</sub>OD, 125 MHz, ppm): 161.0, 146.5, 144.4, 136.5, 136.4, 133.3, 132.1, 129.3, 128.6, 125.9, 122.4, 118.8, 96.1, 18.6, 17.9, 12.6. IR(KBr): OH 3418cm<sup>-1</sup>; HRMS (ESI) calcd for C<sub>18</sub>H<sub>18</sub>N<sub>2</sub>O<sub>3</sub>SNa (M + H)<sup>+</sup> 365.0936, found 365.0939.

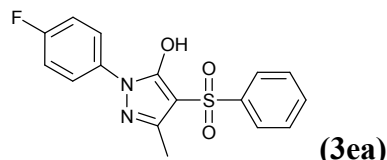

**1-(4-fluorophenyl)-3-methyl-4-(phenylsulfonyl)-1H-pyrazol-5-ol**, Compound **3ea** was obtained in 91% yield according to the general procedure (2h). White solid, mp: 201.7-202.5 °C. <sup>1</sup>H NMR (CD<sub>3</sub>OD, 500 MHz, ppm): δ 8.00 (d, *J* = 7.8 Hz, 2H), 7.85-7.82 (dd, *J*<sub>1</sub> = 8.5 Hz, *J*<sub>2</sub> = 5.0 Hz, 2H), 7.54 (t, *J* = 5.5 Hz, 1H), 7.47 (t, *J* = 6.4 Hz, 2H), 7.00 (brs, 2H), 2.18 (s, 3H); <sup>13</sup>C NMR (CD<sub>3</sub>OD, 125 MHz, ppm): 161.9, 159.8 (d, *J* = 244.3 Hz), 146.9, 145.0, 135.7, 132.1, 128.6, 125.7, 122.5 (d, *J* = 7.6 Hz), 114.7 (d, *J* = 22.5 Hz), 94.9, 12.8. IR(KBr): OH 3412cm<sup>-1</sup>; HRMS (ESI) calcd for C<sub>16</sub>H<sub>13</sub>FN<sub>2</sub>O<sub>3</sub>SNa (M + Na)<sup>+</sup> 355.0529, found 355.0533.

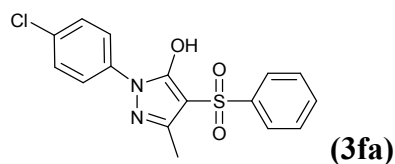

**1-(4-chlorophenyl)-3-methyl-4-(phenylsulfonyl)-1H-pyrazol-5-ol**, Compound **3fa** was obtained in 95% yield according to the general procedure (4h). Yellow solid, mp: 241.9-242.7 °C. <sup>1</sup>H NMR (CD<sub>3</sub>OD, 500 MHz, ppm): δ 8.00 (d, *J* = 7.7 Hz, 2H), 7.89 (d, *J* = 8.9 Hz, 2H), 7.53 (t, *J* = 6.7 Hz, 1H), 7.44 (t, *J* = 7.4 Hz, 2H), 7.22 (d, *J* = 7.4 Hz, 2H), 2.17 (s, 3H); <sup>13</sup>C NMR (CD<sub>3</sub>OD, 125 MHz, ppm): 161.9, 147.2, 144.6, 138.0, 132.1, 129.1, 128.6, 128.1, 125.7, 121.5, 95.1, 12.8. IR(KBr): OH 3429cm<sup>-1</sup>; HRMS (ESI) calcd for C<sub>16</sub>H<sub>13</sub>ClN<sub>2</sub>O<sub>3</sub>SNa (M + Na)<sup>+</sup> 371.0233, found 371.0237.

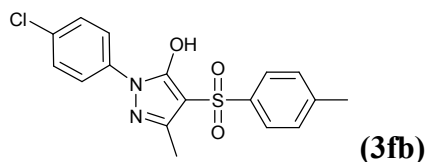

**1-(4-chlorophenyl)-3-methyl-4-tosyl-1H-pyrazol-5-ol**, Compound **3fb** was obtained in 98% yield according to the general procedure (2h). Yellow solid, mp: 219.7-220.6 °C. <sup>1</sup>H NMR (CD<sub>3</sub>OD, 500 MHz, ppm): δ 7.87 (d, *J* = 2.5 Hz, 2H), 7.85 (d, *J* = 2.4 Hz, 2H), 7.22 (d, *J* = 6.6 Hz, 4H), 2.37 (s, 3H), 2.16 (s, 3H); <sup>13</sup>C NMR (CD<sub>3</sub>OD, 125 MHz, ppm): 161.8, 147.3, 143.0, 141.7, 138.0, 129.3, 129.1, 128.1, 125.8, 121.6, 95.4, 20.1, 12.8. IR(KBr): OH 3428cm<sup>-1</sup>; HRMS (ESI) calcd for C<sub>17</sub>H<sub>15</sub>ClN<sub>2</sub>O<sub>3</sub>SNa (M + Na)<sup>+</sup> 385.0390, found 385.0395.

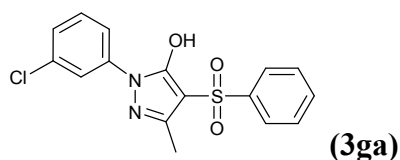

**1-(3-chlorophenyl)-3-methyl-4-(phenylsulfonyl)-1H-pyrazol-5-ol**, Compound **3ga** was obtained in 95% yield according to the general procedure (2h). Yellow solid, mp: 232.1-233.2 °C. <sup>1</sup>H NMR (CD<sub>3</sub>OD, 500 MHz, ppm): δ 8.02 (s, 1H), 7.99 (d, *J* = 7.7 Hz, 2H), 7.87 (d, *J* = 8.2 Hz, 1H), 7.53 (brs, 1H), 7.43 (brs, 2H), 7.24 (brs, 1H), 7.09 (brs, 1H), 2.18 (s, 3H); <sup>13</sup>C NMR (CD<sub>3</sub>OD, 125 MHz, ppm): 162.2, 147.5, 144.5, 140.5, 133.7, 132.1, 129.4, 128.6, 125.7, 123.7, 119.8, 118.0, 95.2, 12.9. IR(KBr): OH 3438cm<sup>-1</sup>; HRMS (ESI) calcd for C<sub>16</sub>H<sub>13</sub>ClN<sub>2</sub>O<sub>3</sub>SNa (M + Na)<sup>+</sup> 371.0233, found 371.0234.

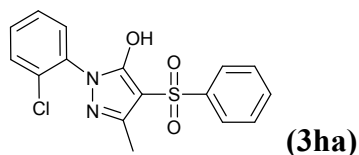

**1-(2-chlorophenyl)-3-methyl-4-(phenylsulfonyl)-1H-pyrazol-5-ol**, Compound **3ha** was obtained in 93% yield according to the general procedure (2h). Yellow solid, mp: 221.7-222.9 °C. <sup>1</sup>H NMR (CD<sub>3</sub>OD, 500 MHz, ppm): δ 7.99 (d, *J* = 7.4 Hz, 2H), 7.57 (t, *J* = 7.4 Hz, 1H), 7.52-7.48 (m, 3H), 7.40-7.32 (m, 3H), 2.17 (s, 3H); <sup>13</sup>C NMR (CD<sub>3</sub>OD, 125 MHz, ppm): 162.2, 147.0, 144.7, 136.1, 132.6, 132.0, 130.3, 129.8, 129.3, 128.6, 127.1, 125.6, 94.1, 12.9. IR(KBr): OH 3429cm<sup>-1</sup>; HRMS (ESI) calcd for

$C_{16}H_{13}ClN_2O_3SNa$  ( $M + Na$ )<sup>+</sup> 371.0233, found 371.0235.

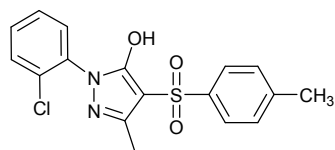

**1-(2-chlorophenyl)-3-methyl-4-tosyl-1H-pyrazol-5-ol**, Compound **3hb** was obtained in 92% yield according to the general procedure (2h). Yellow solid, mp: 211.7-212.9 °C. <sup>1</sup>H NMR (CD<sub>3</sub>OD, 500 MHz, ppm): δ 7.86 (d, *J* = 8.2 Hz, 2H), 7.51 (d, *J* = 7.8 Hz, 1H), 7.38-7.32 (m, 3H), 7.28 (d, *J* = 7.4 Hz, 2H), 2.41 (s, 3H), 2.17 (s, 3H); <sup>13</sup>C NMR (CD<sub>3</sub>OD, 125 MHz, ppm): 162.1, 147.0, 143.0, 141.6, 136.1, 132.6, 130.2, 129.7, 129.3, 129.1, 127.0, 125.8, 94.4, 20.1, 12.8. IR(KBr): OH 3428cm<sup>-1</sup>; HRMS (ESI) calcd for  $C_{17}H_{15}ClN_2O_3SNa$  ( $M + Na$ )<sup>+</sup> 385.0390, found 385.0395.

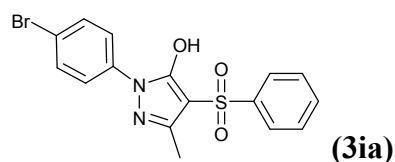

**1-(4-bromophenyl)-3-methyl-4-(phenylsulfonyl)-1H-pyrazol-5-ol**, Compound **3ia** was obtained in 90% yield according to the general procedure (4h). Yellow solid, mp: 229.2-230.7 °C. <sup>1</sup>H NMR (CD<sub>3</sub>OD, 500 MHz, ppm): δ 7.99 (d, *J* = 7.8 Hz, 2H), 7.83 (d, *J* = 7.8 Hz, 2H), 7.54 (brs, 1H), 7.45 (brs, 2H), 7.38 (brs, 2H), 2.16 (s, 3H); <sup>13</sup>C NMR (CD<sub>3</sub>OD, 125 MHz, ppm): 162.0, 147.3, 144.5, 138.5, 132.1, 131.1, 128.6, 125.7, 121.8, 116.8, 95.0, 12.8. IR(KBr): OH 3429cm<sup>-1</sup>; HRMS (ESI) calcd for  $C_{16}H_{13}BrN_2O_3SNa$  ( $M + Na$ )<sup>+</sup> 414.9728, found 414.9731.

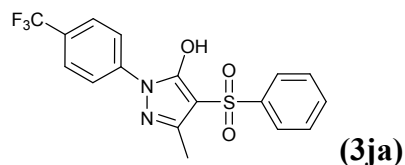

**3-methyl-4-(phenylsulfonyl)-1-(4-(trifluoromethyl)phenyl)-1H-pyrazol-5-ol**, Compound **3ja** was obtained in 74% yield according to the general procedure (4h). White solid, mp: 209.6-210.7 °C. <sup>1</sup>H NMR (CD<sub>3</sub>OD, 500 MHz, ppm): δ 8.16 (d, *J* = 8.6 Hz, 2H), 8.01 (d, *J* = 7.7 Hz, 2H), 7.54-7.46 (m, 5H), 2.18 (s, 3H); <sup>13</sup>C NMR (CD<sub>3</sub>OD, 125 MHz, ppm): 162.6, 147.9, 144.6, 142.4, 132.1 (d, *J* = 4.3 Hz), 128.6, 127.6, 125.7, 125.2 (d, *J* = 13.9 Hz), 124.4 (d, *J* = 278.7 Hz), 119.3, 95.2, 12.9.

IR(KBr): OH 3429cm<sup>-1</sup>; HRMS (ESI) calcd for C<sub>17</sub>H<sub>13</sub>F<sub>3</sub>N<sub>2</sub>O<sub>3</sub>SNa (M + Na)<sup>+</sup> 405.0497, found 405.0499.

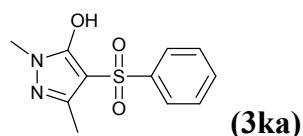

**1,3-dimethyl-4-(phenylsulfonyl)-1H-pyrazol-5-ol**, Compound **3ka** was obtained in 60% yield according to the general procedure (2h). White solid, mp: 250.3-251.7 °C. <sup>1</sup>H NMR (CD<sub>3</sub>OD, 500 MHz, ppm): δ 7.95 (d, *J* = 7.5 Hz, 2H), 7.56 (t, *J* = 6.7 Hz, 1H), 7.48 (t, *J* = 7.5 Hz, 2H), 3.36 (s, 3H), 2.13 (s, 3H); <sup>13</sup>C NMR (CD<sub>3</sub>OD, 125 MHz, ppm): 160.2, 145.3, 132.0, 129.2, 128.6, 125.6, 96.4, 30.2, 12.4. IR(KBr): OH 3534cm<sup>-1</sup>; HRMS (ESI) calcd for C<sub>11</sub>H<sub>12</sub>N<sub>2</sub>O<sub>3</sub>SNa (M + Na)<sup>+</sup> 275.0466, found 275.0469.

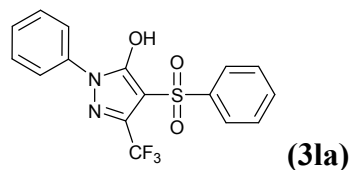

**1-phenyl-4-(phenylsulfonyl)-3-(trifluoromethyl)-1H-pyrazol-5-ol**, Compound **3la** was obtained in 44% yield according to the general procedure (4h). Yellow solid, mp: 232.2-233.2 °C. <sup>1</sup>H NMR (CD<sub>3</sub>OD, 500 MHz, ppm): δ 7.83 (d, *J* = 7.9 Hz, 2H), 7.73 (d, *J* = 7.9 Hz, 2H), 7.51-7.49 (m, 3H), 7.38 (t, *J* = 7.7 Hz, 2H), 7.22 (t, *J* = 7.4 Hz, 1H); <sup>13</sup>C NMR (CD<sub>3</sub>OD, 125 MHz, ppm): 161.8, 143.8, 139.0, 130.2, 128.7, 128.3, 125.5, 125.2, 121.9 (d, *J* = 265.3 Hz), 121.3, 121.1 (d, *J* = 267.8 Hz), 99.9. IR(KBr): OH 3395cm<sup>-1</sup>; HRMS (ESI) calcd for C<sub>16</sub>H<sub>11</sub>F<sub>3</sub>N<sub>2</sub>O<sub>3</sub>SNa (M + Na)<sup>+</sup> 391.0340, found 391.0346.

## 6. Copies of NMR spectra for compounds 3aa–3la

3aa

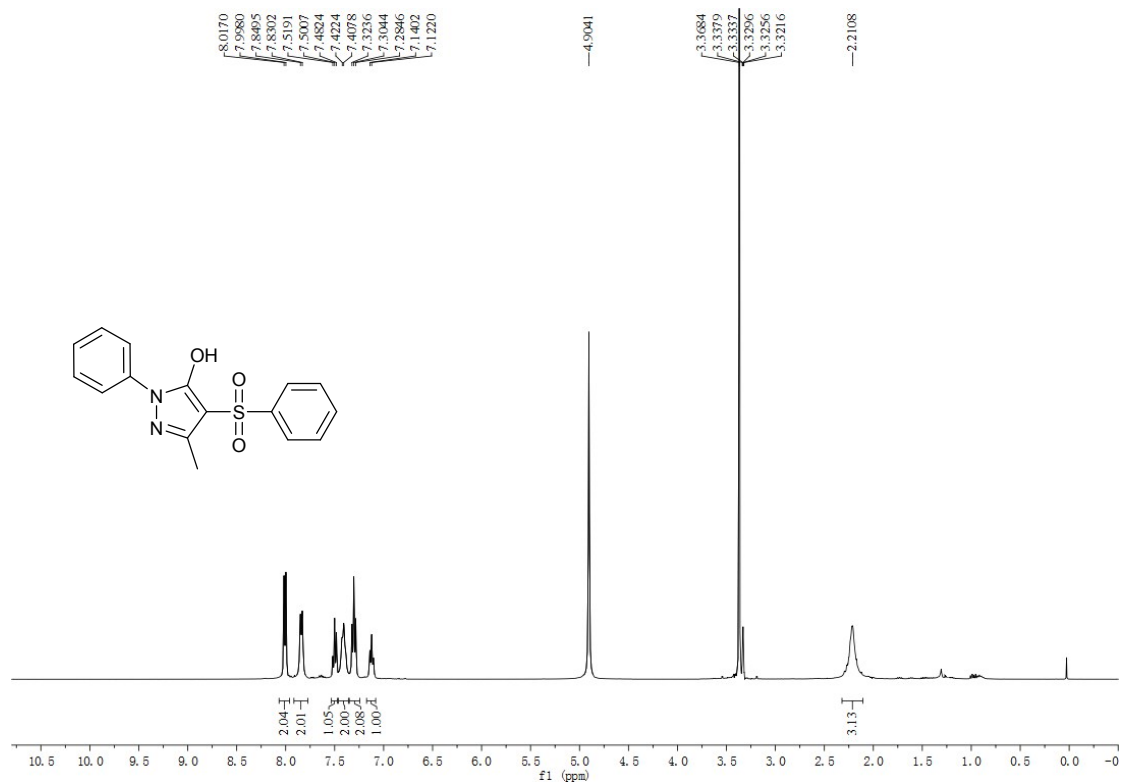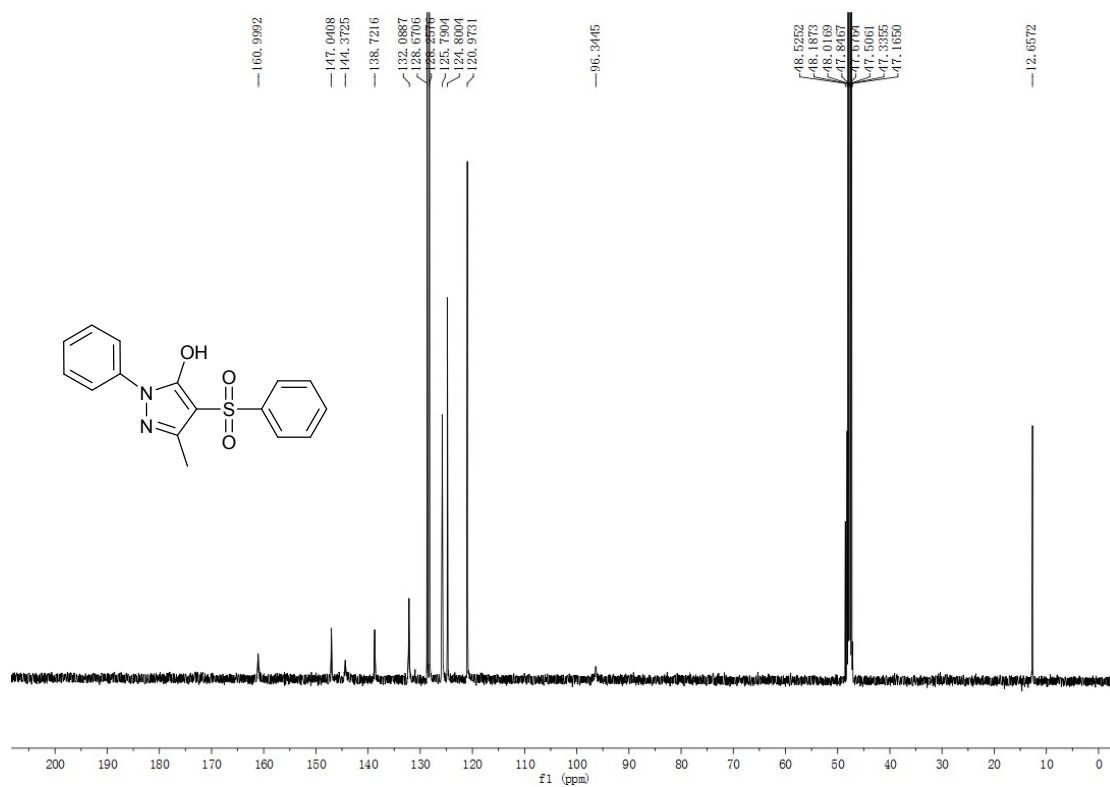

3ab

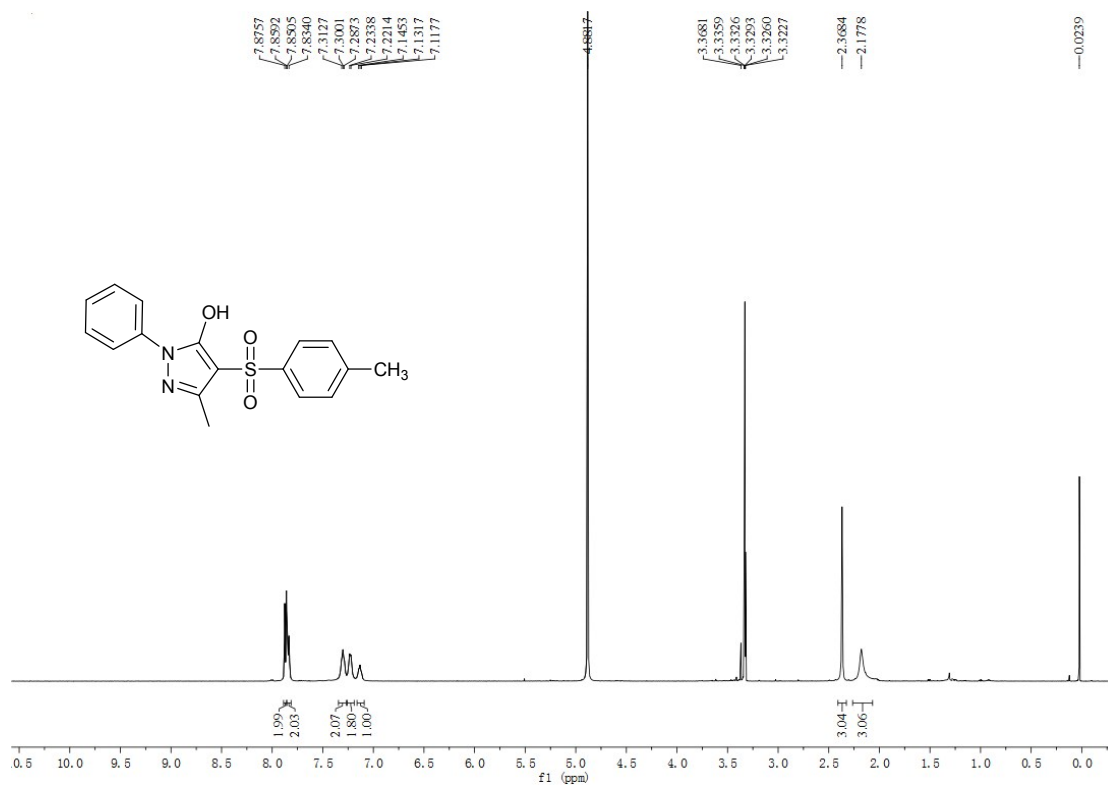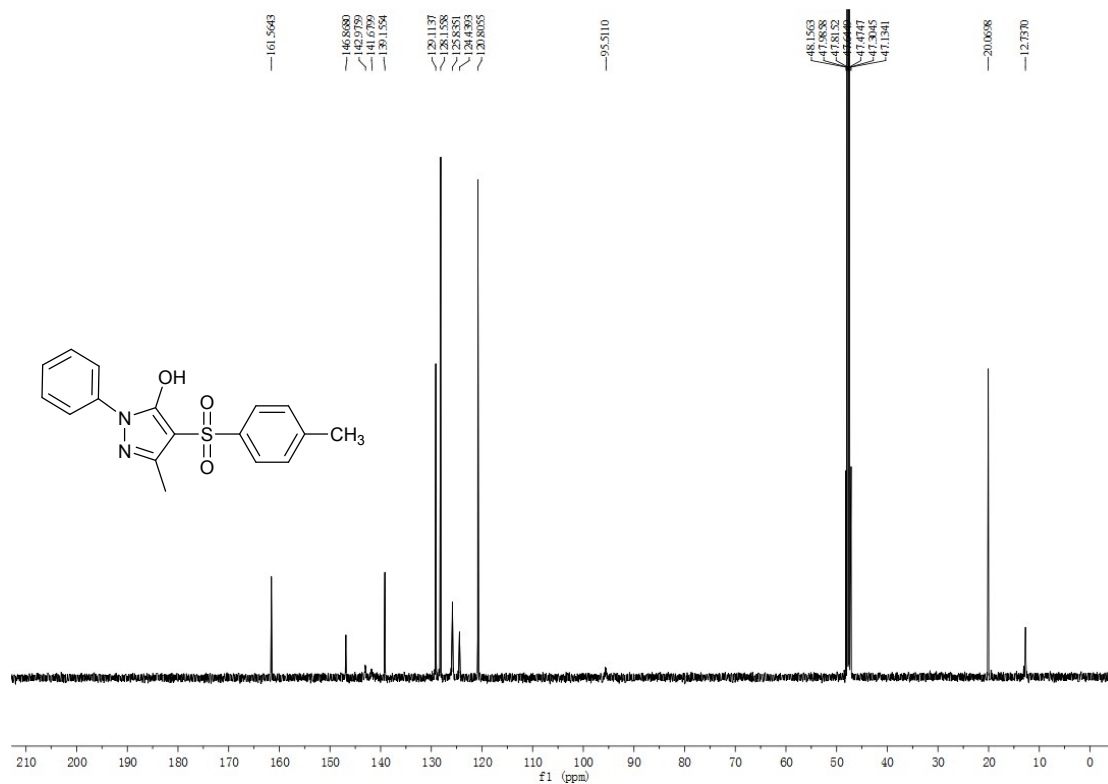

3ac

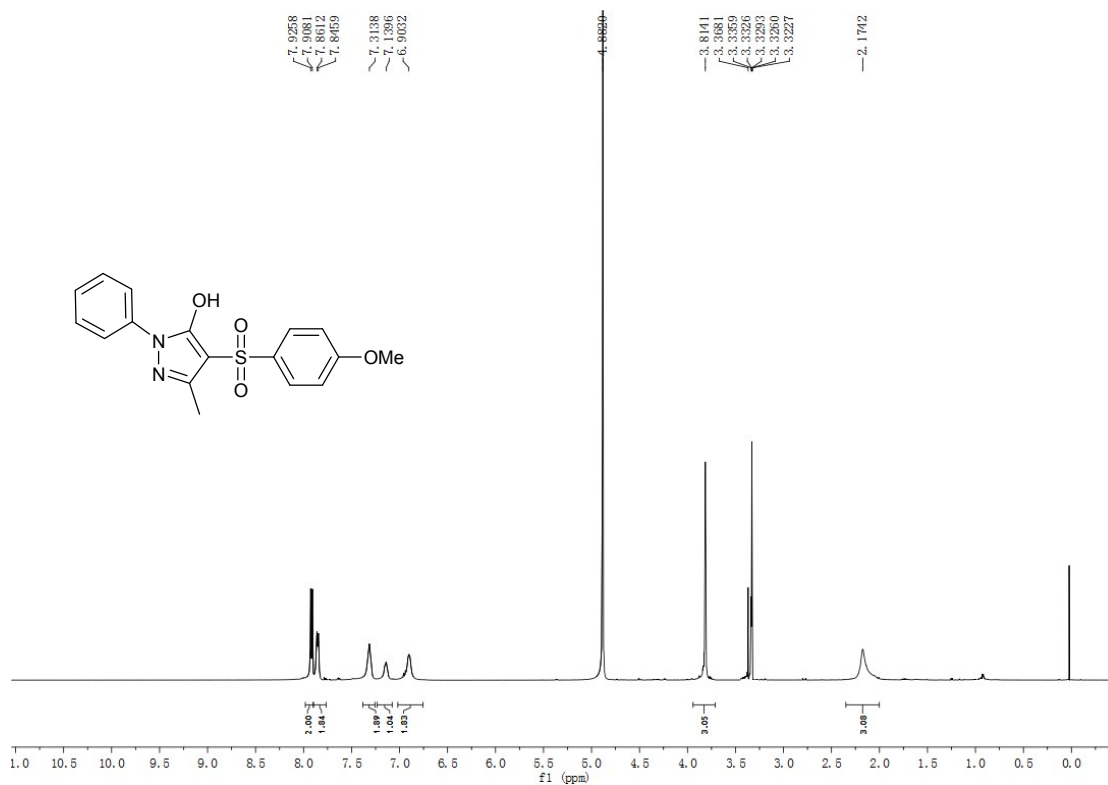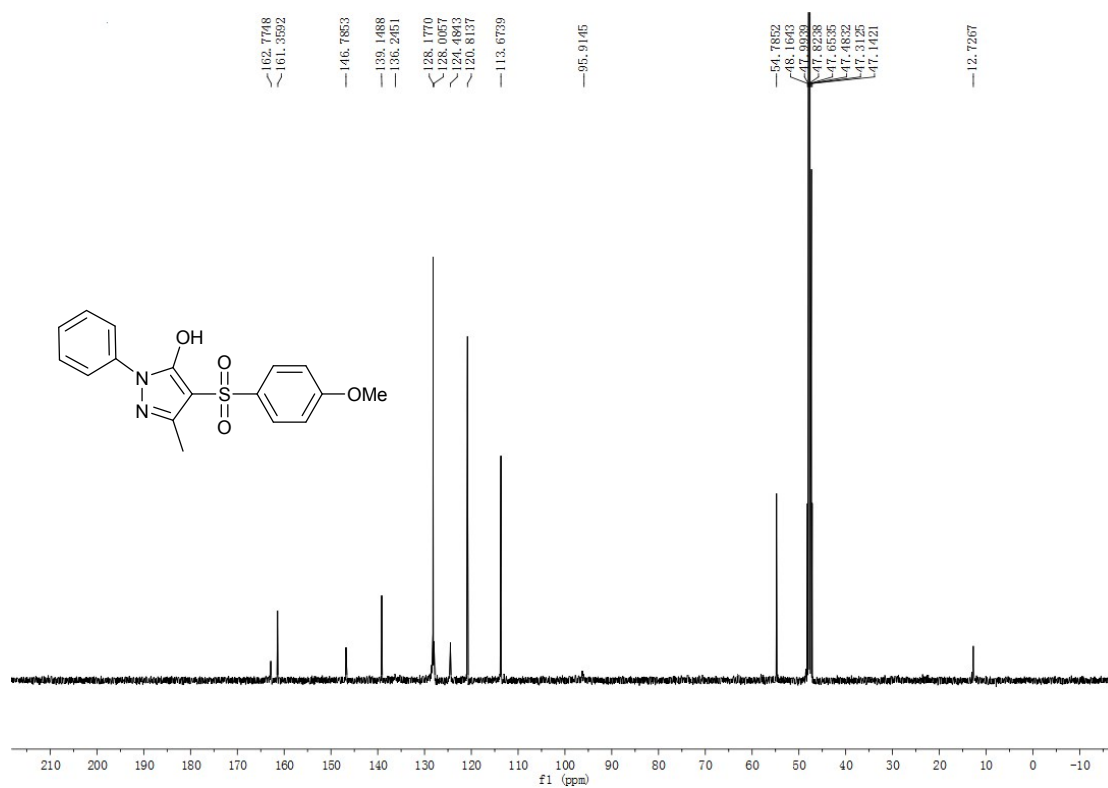



3ad

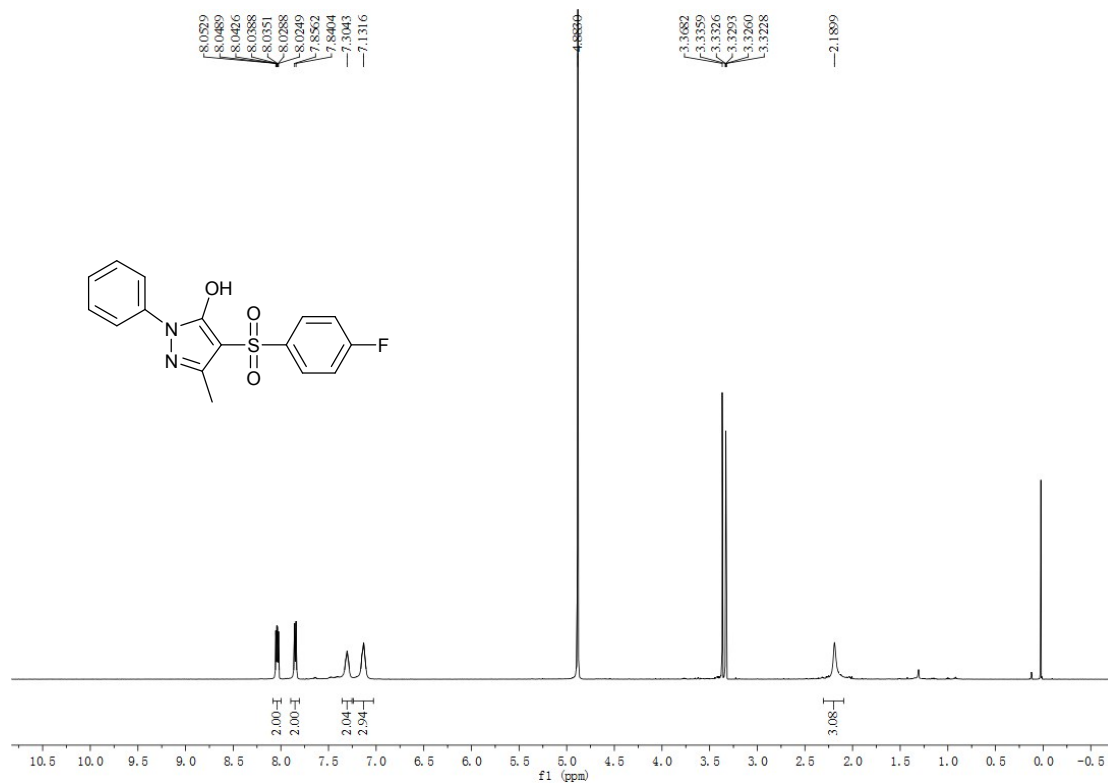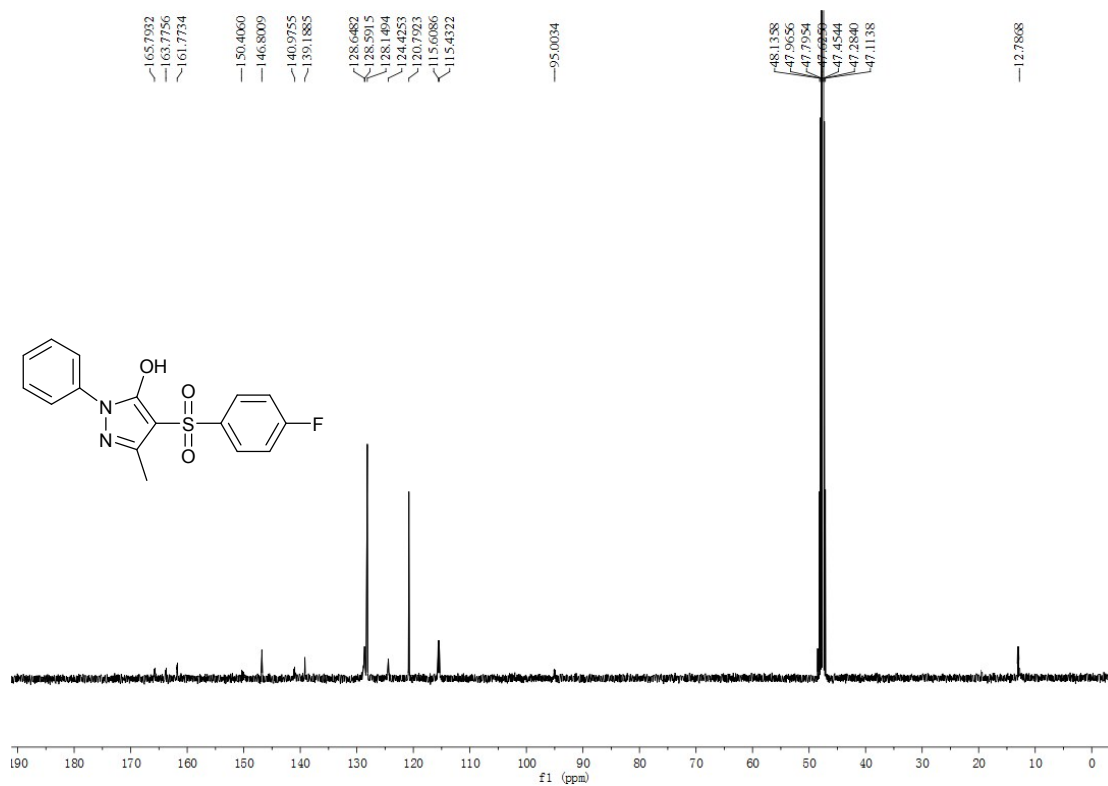

3ae

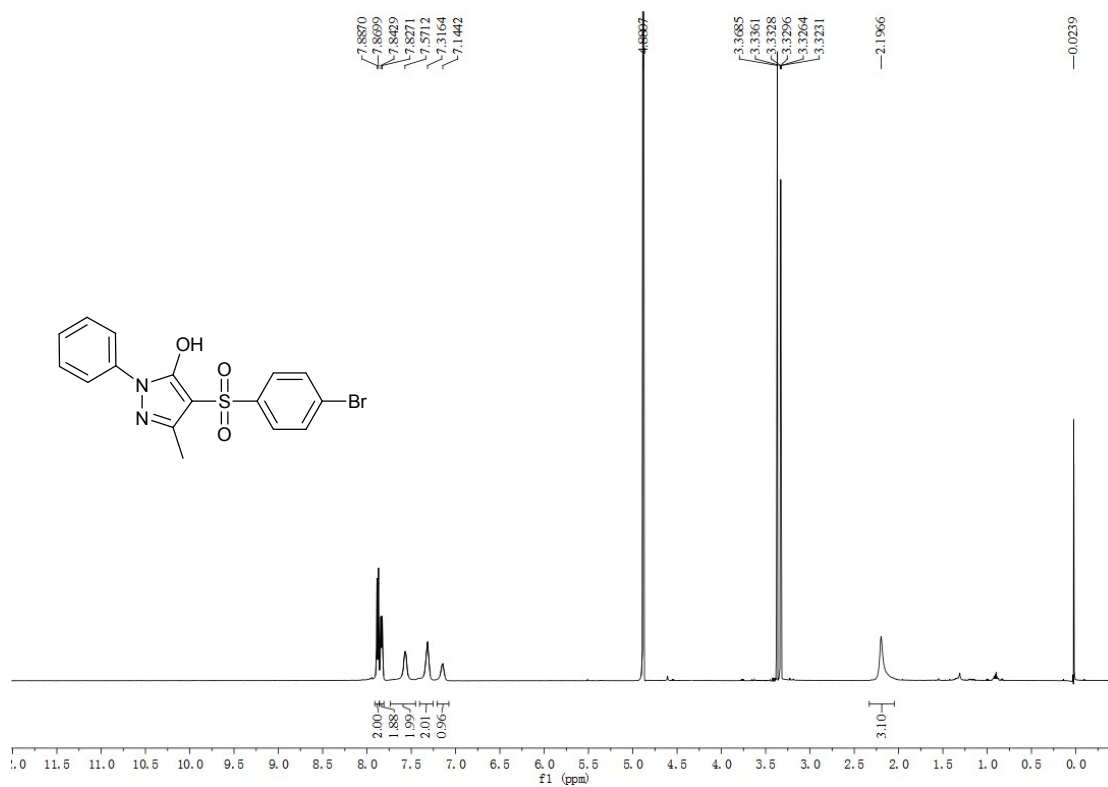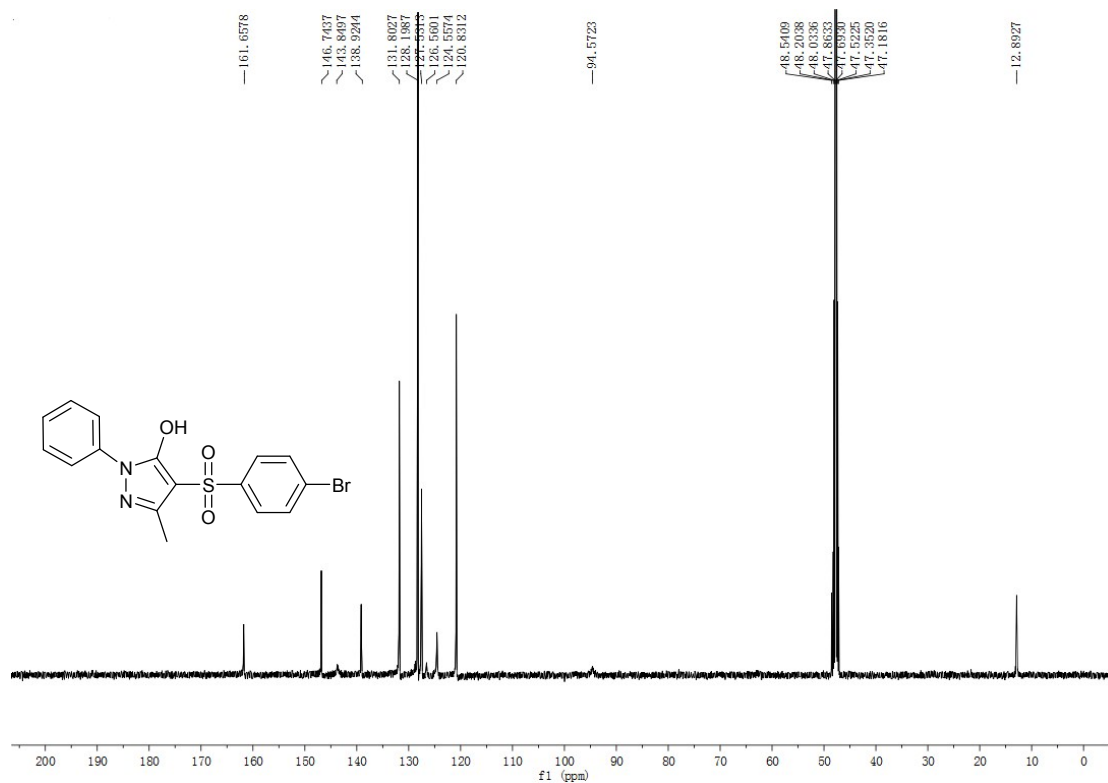

3af

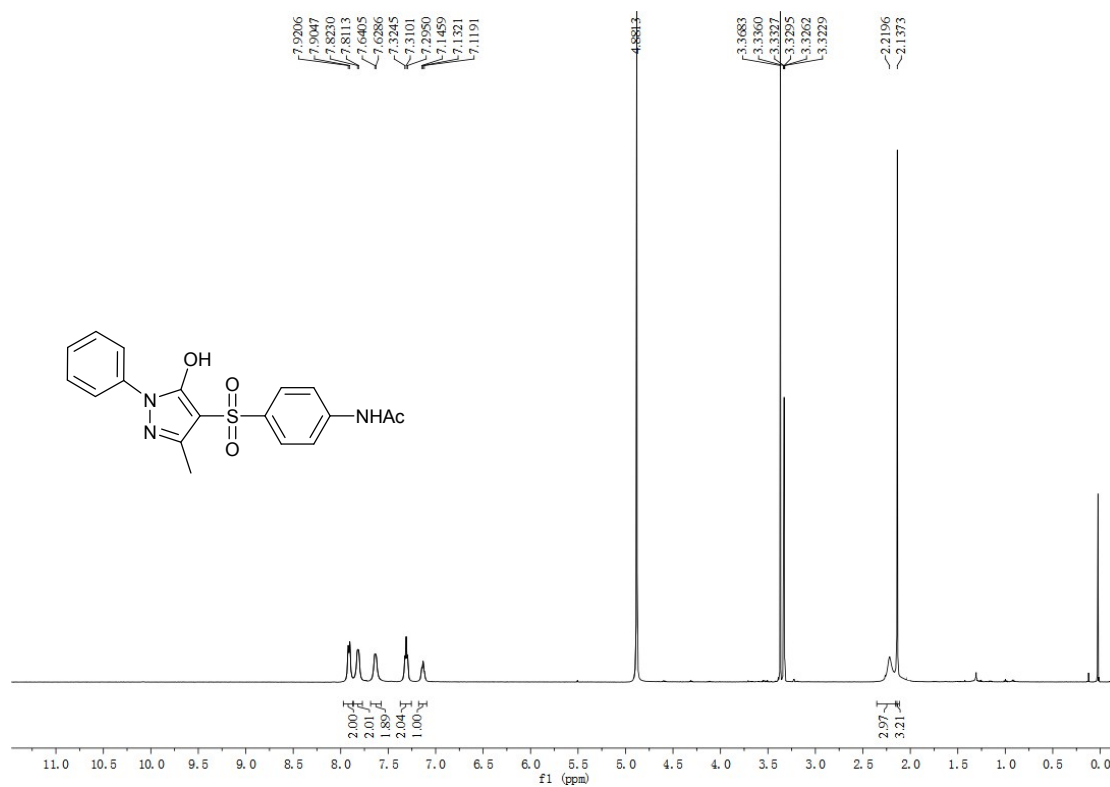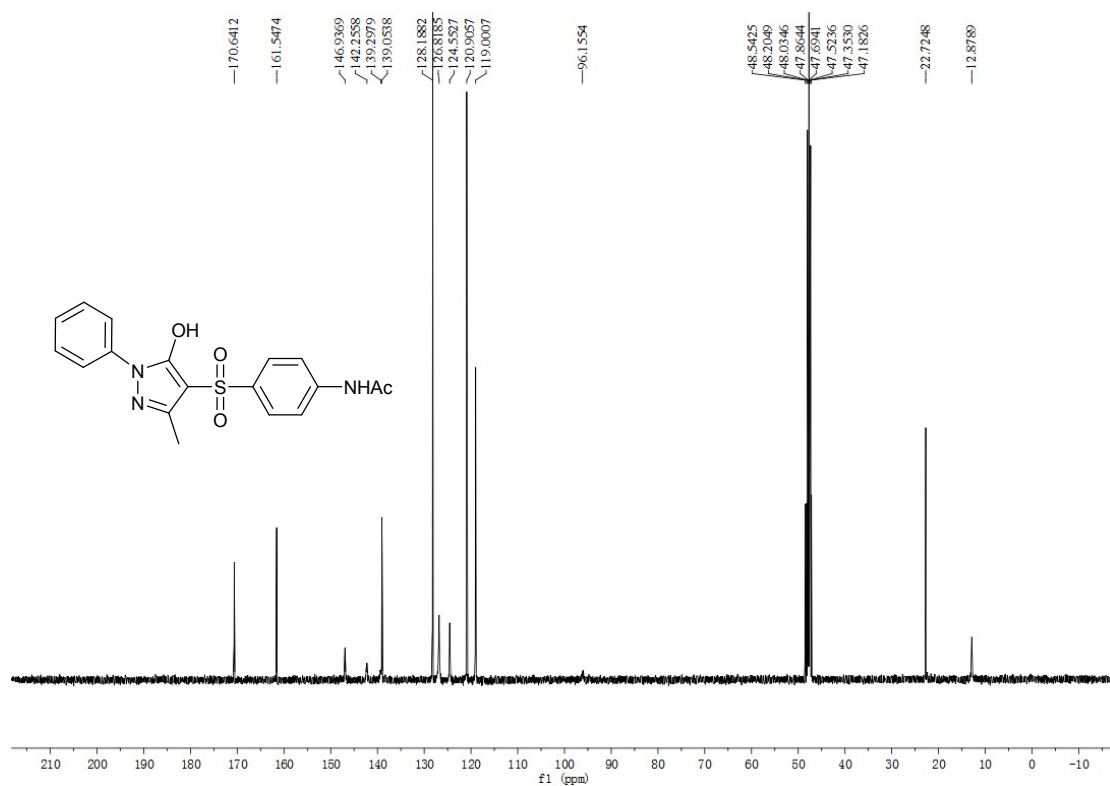

3ag

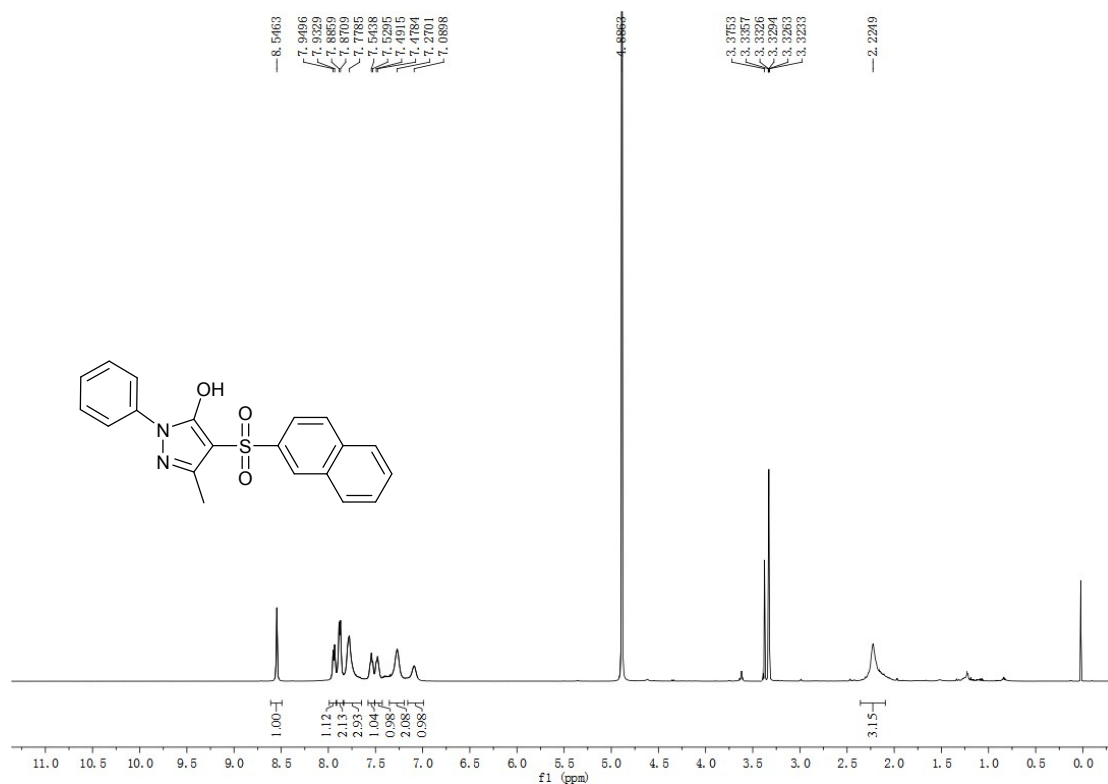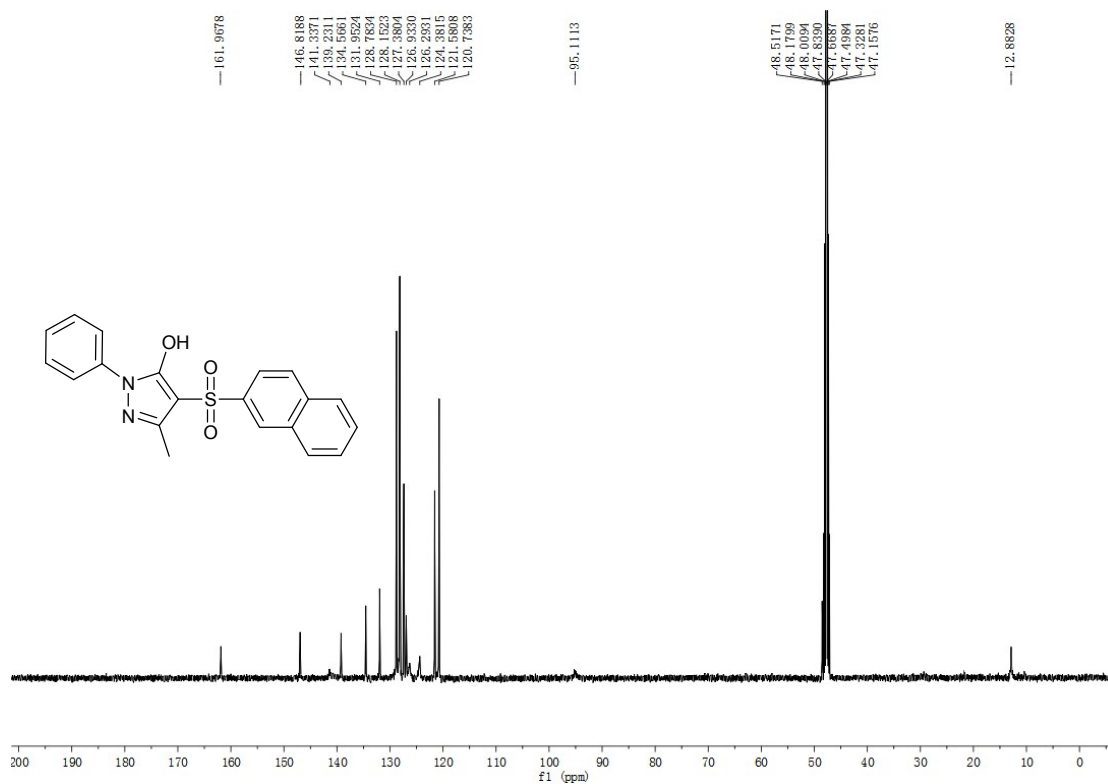

3ah

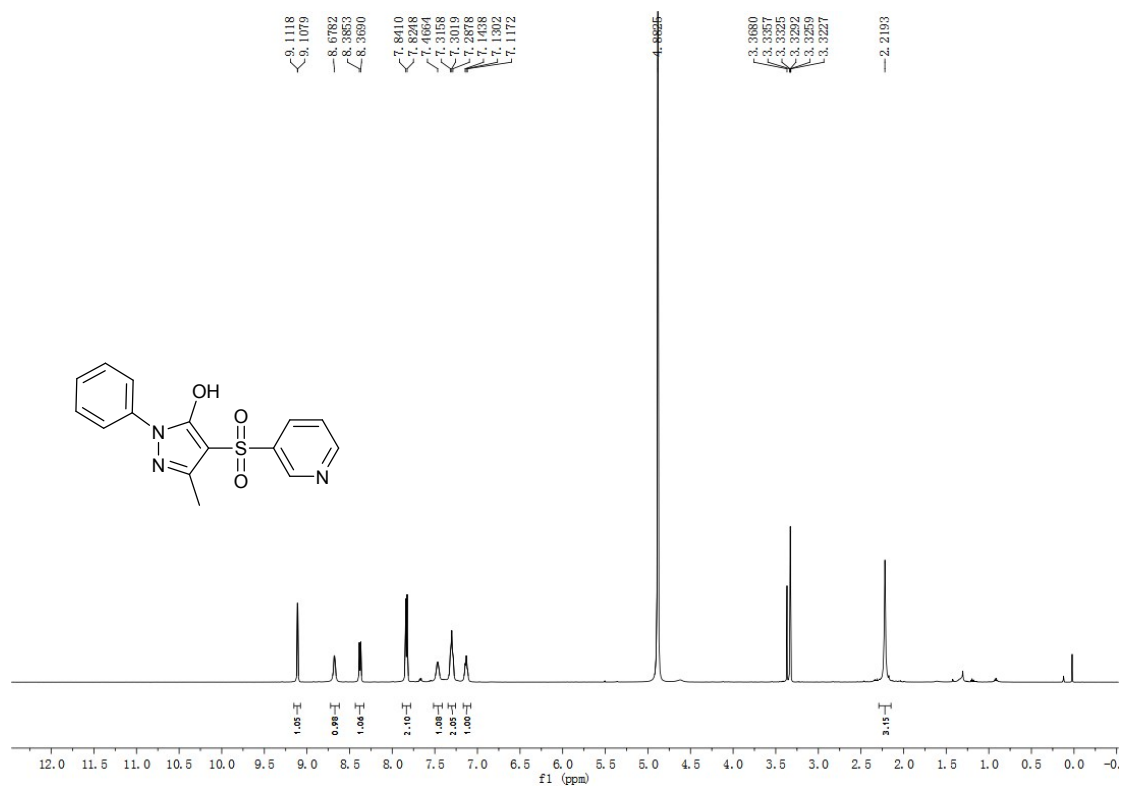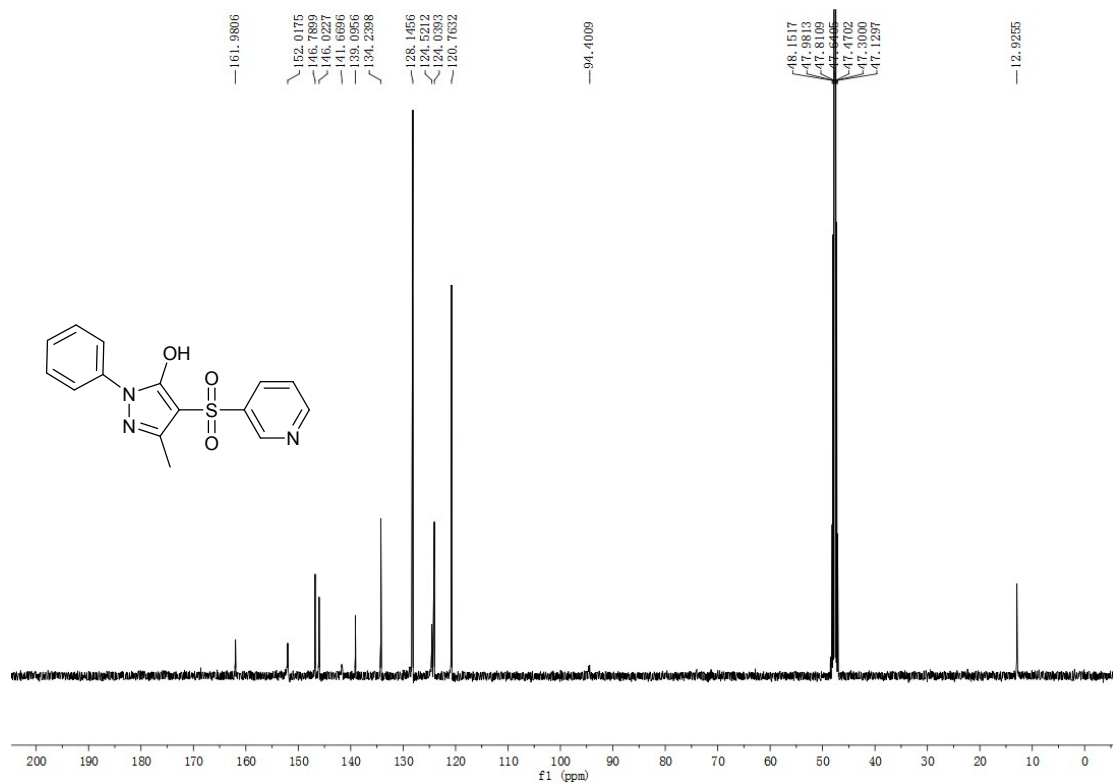

3ai

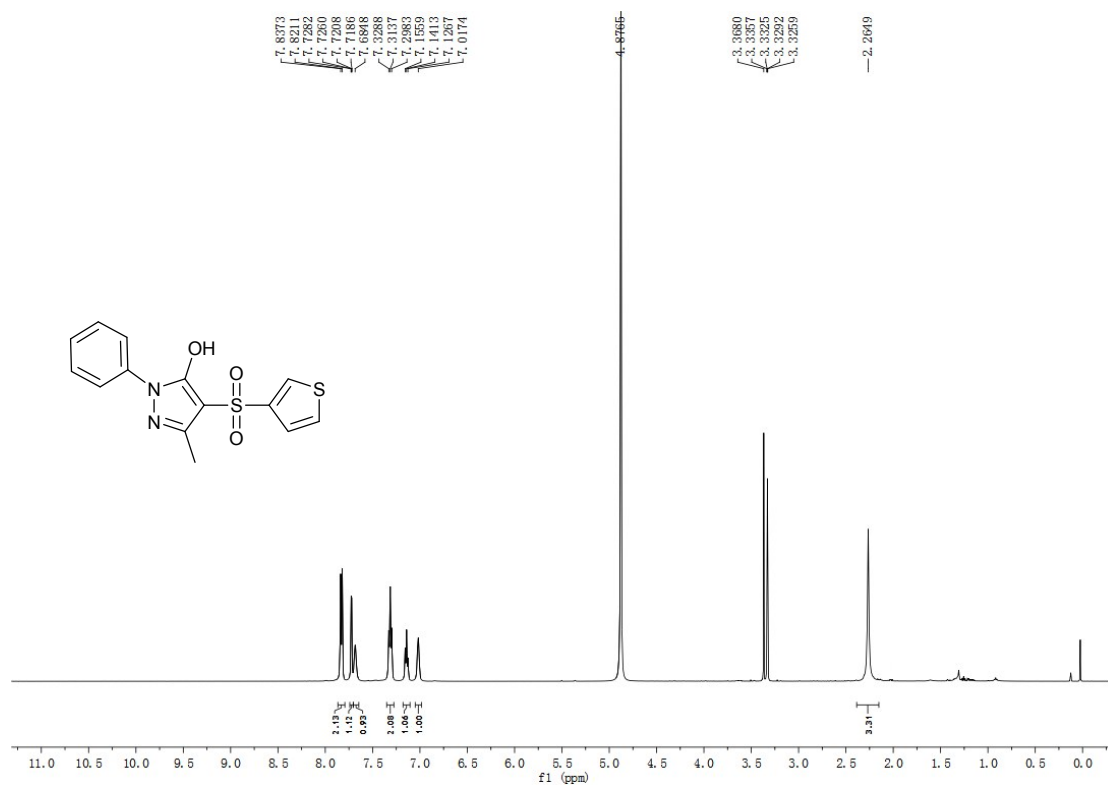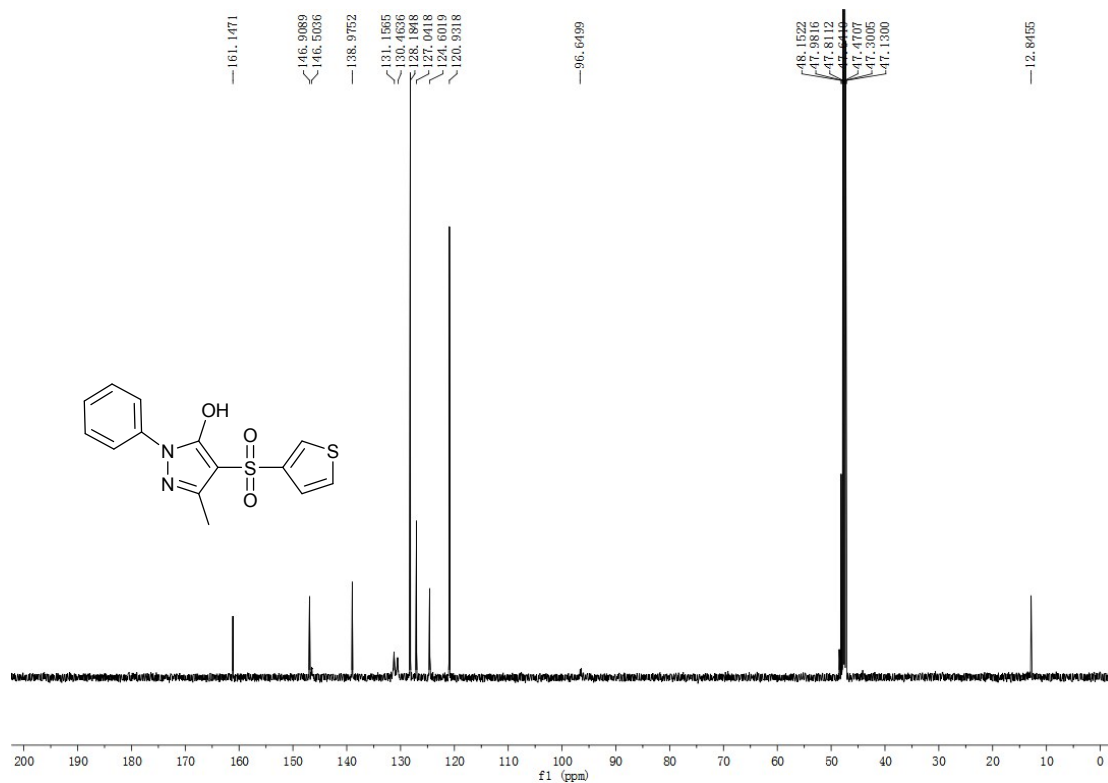

3aj

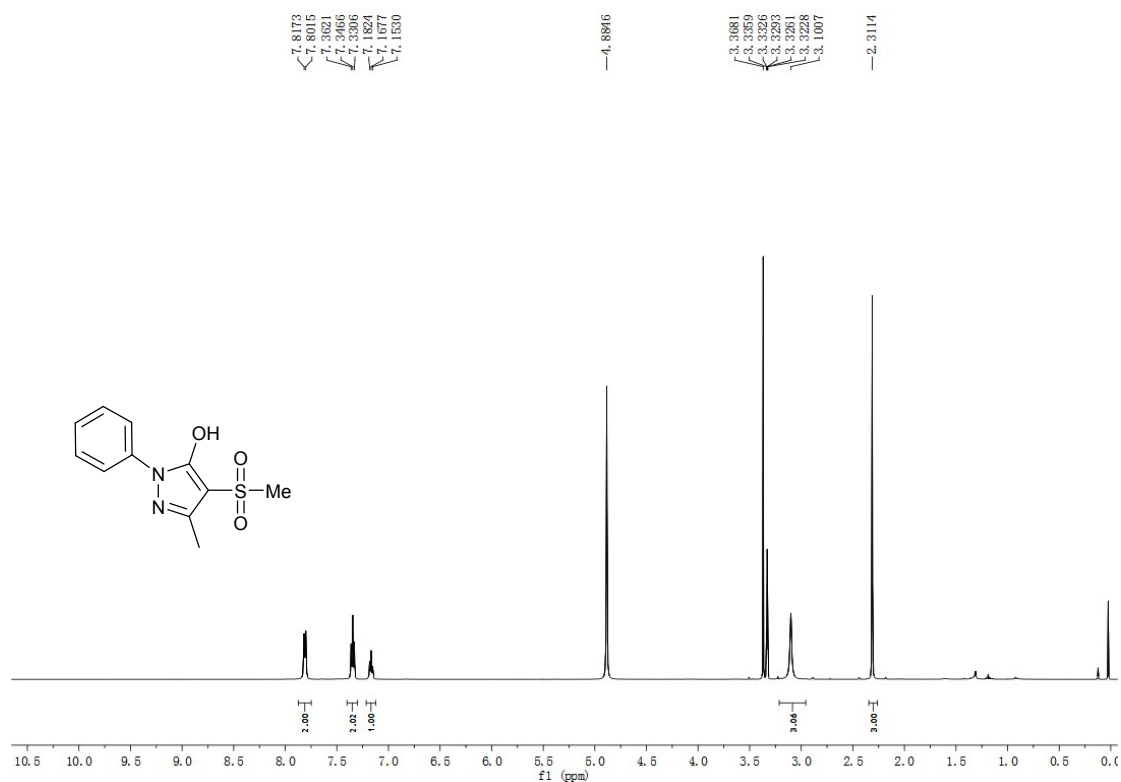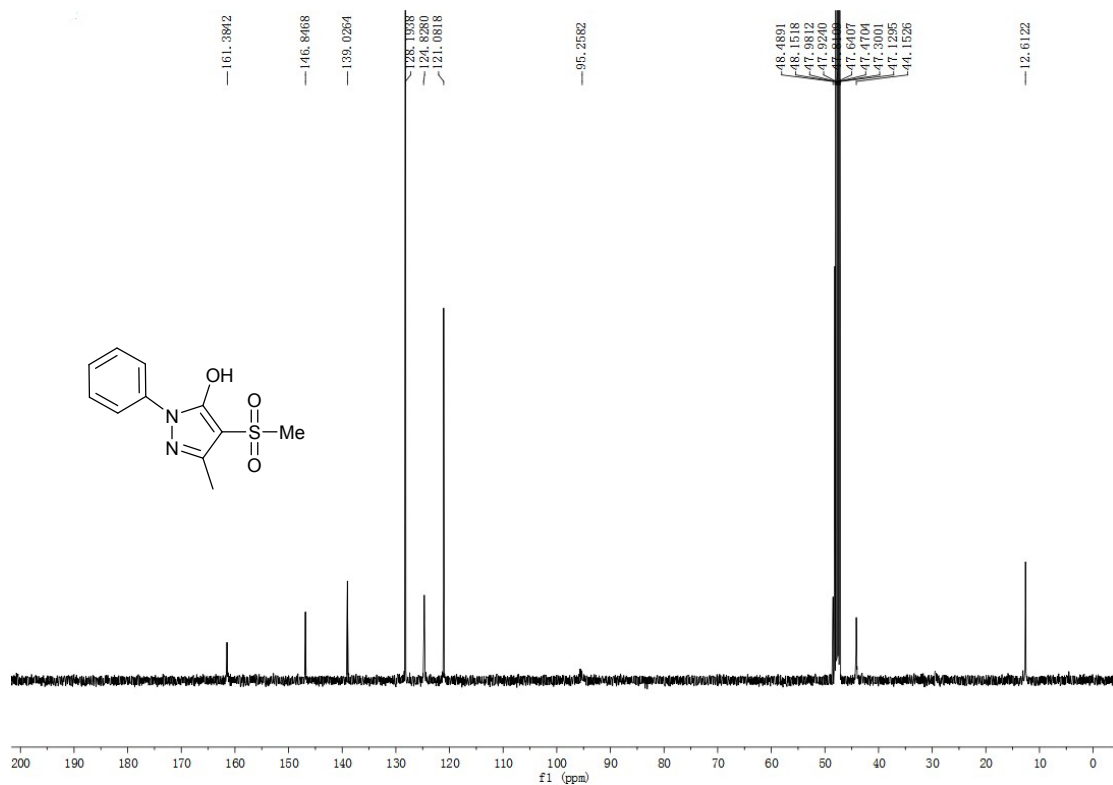

3ba

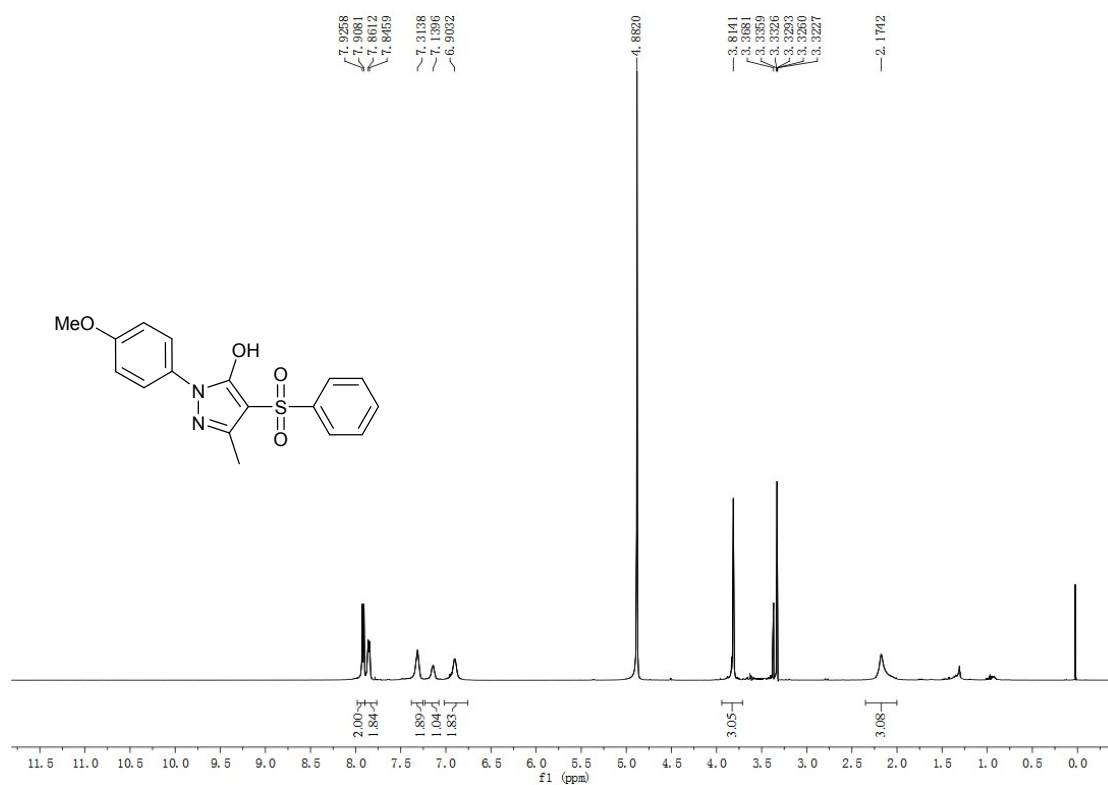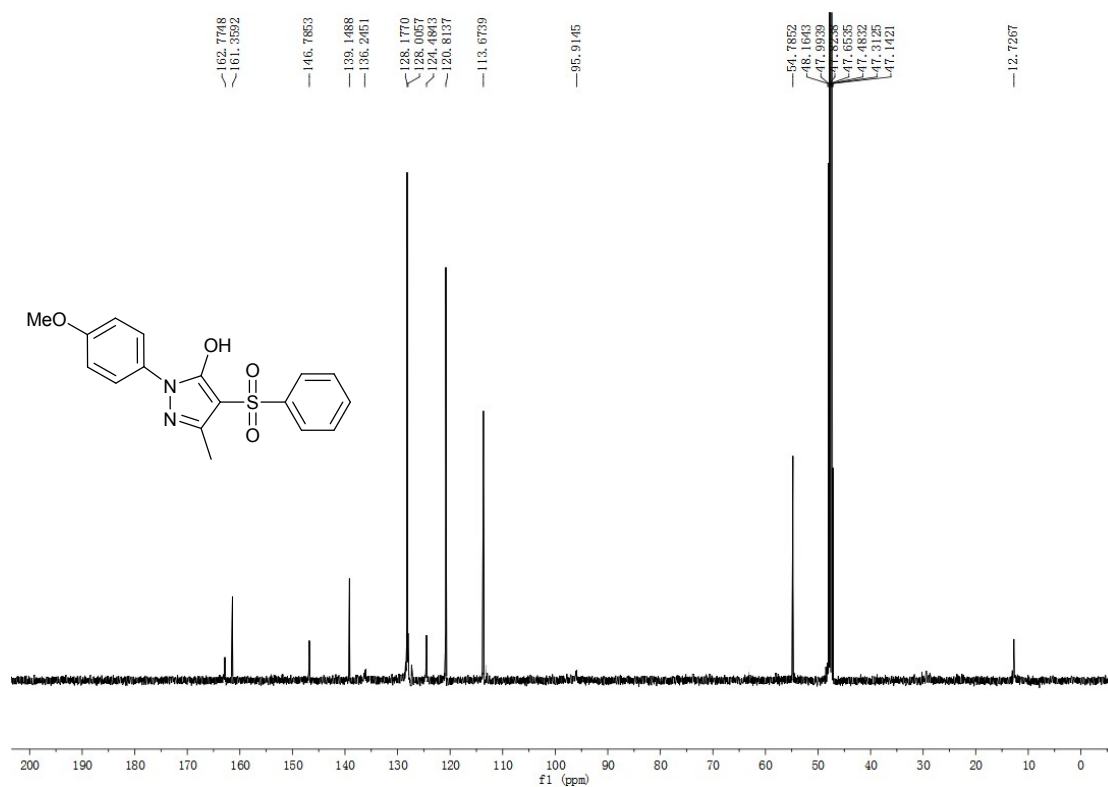



**3ca**

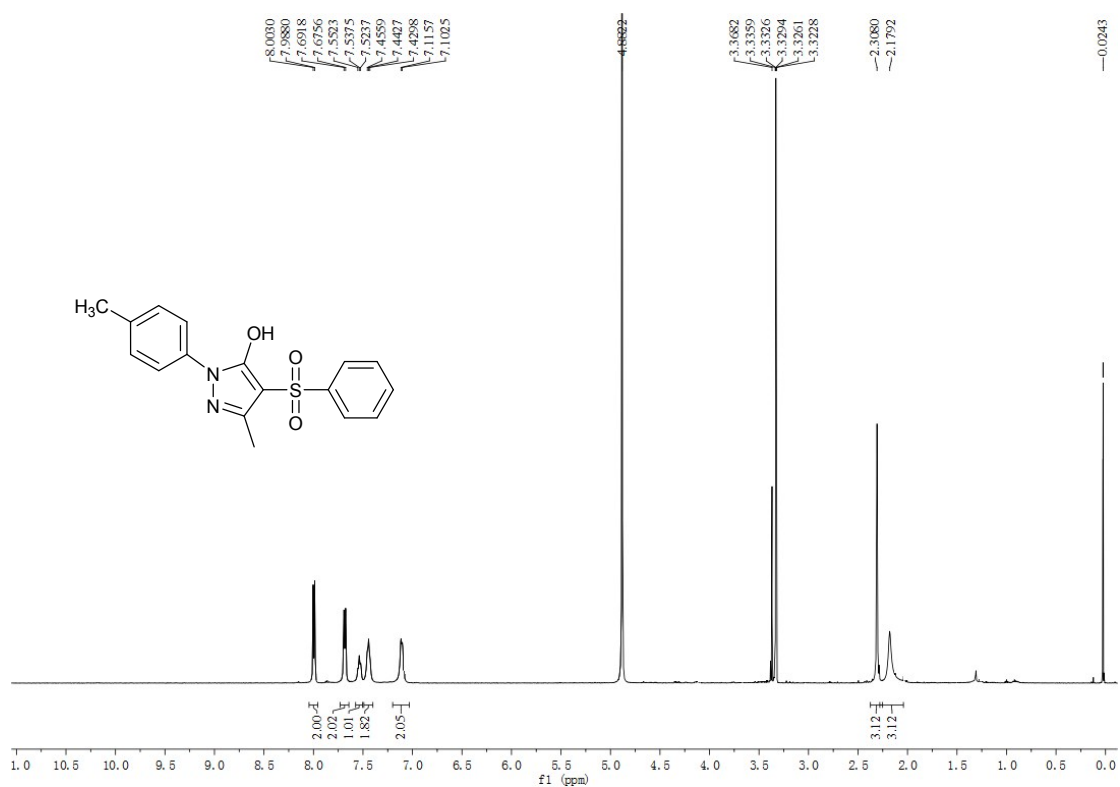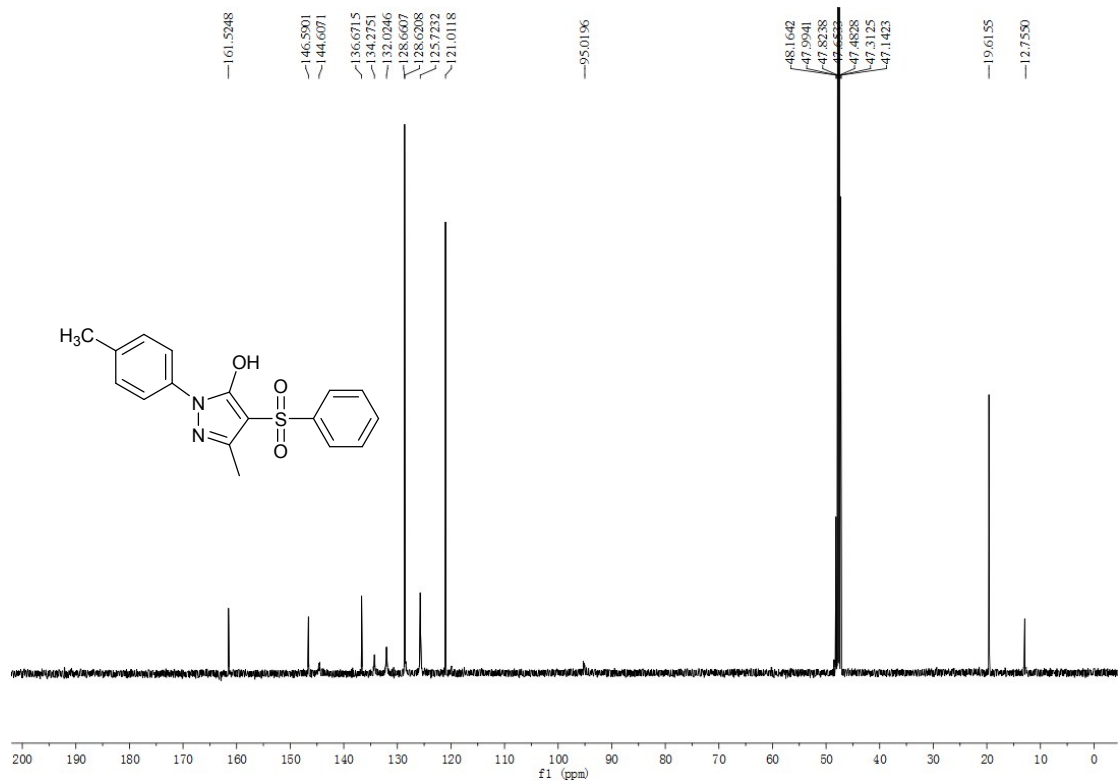

3cb

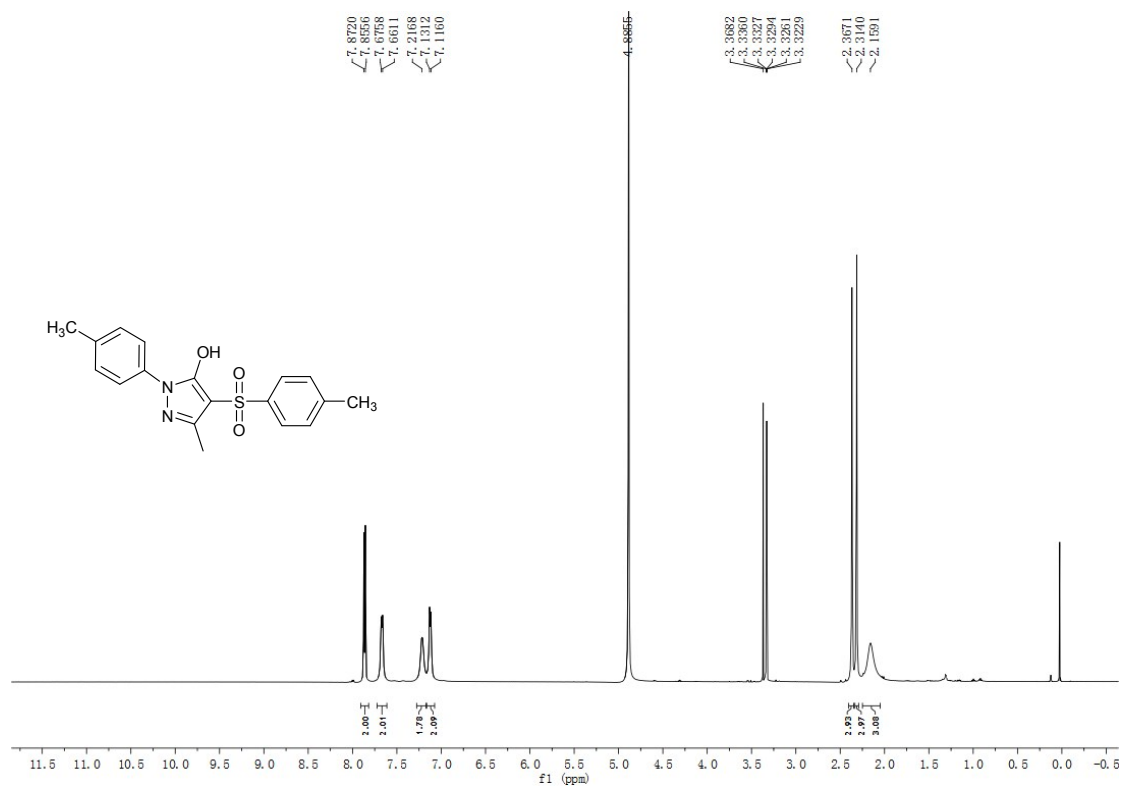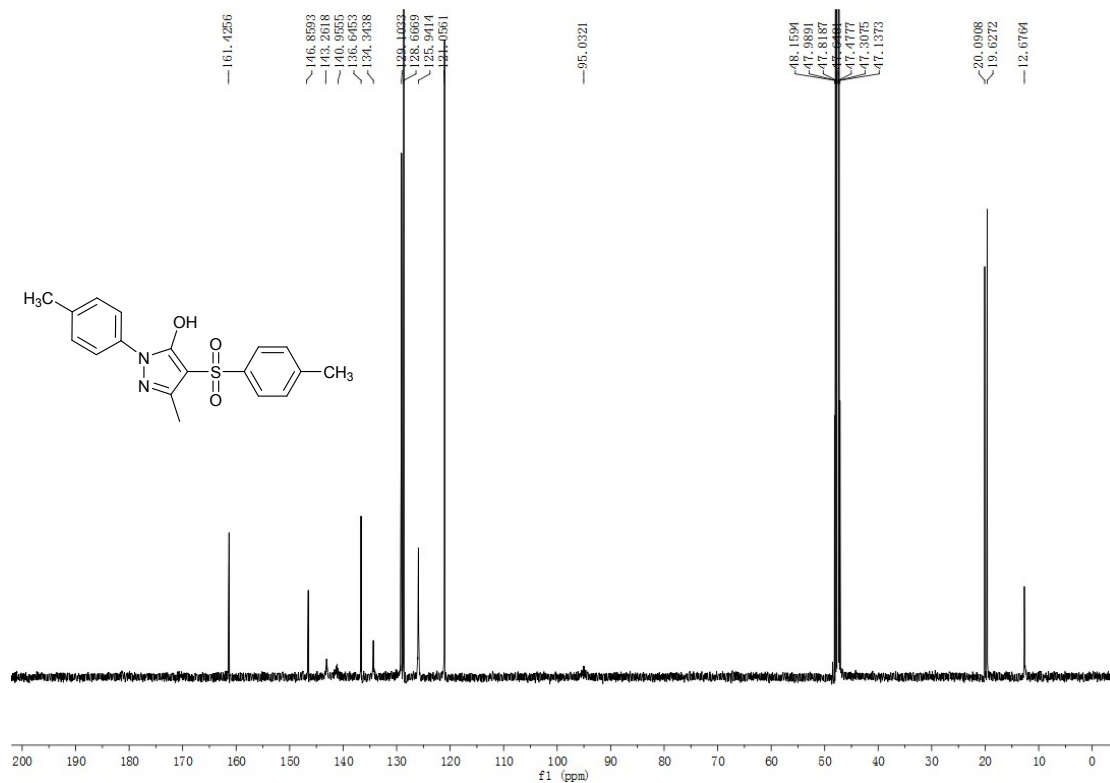

3da

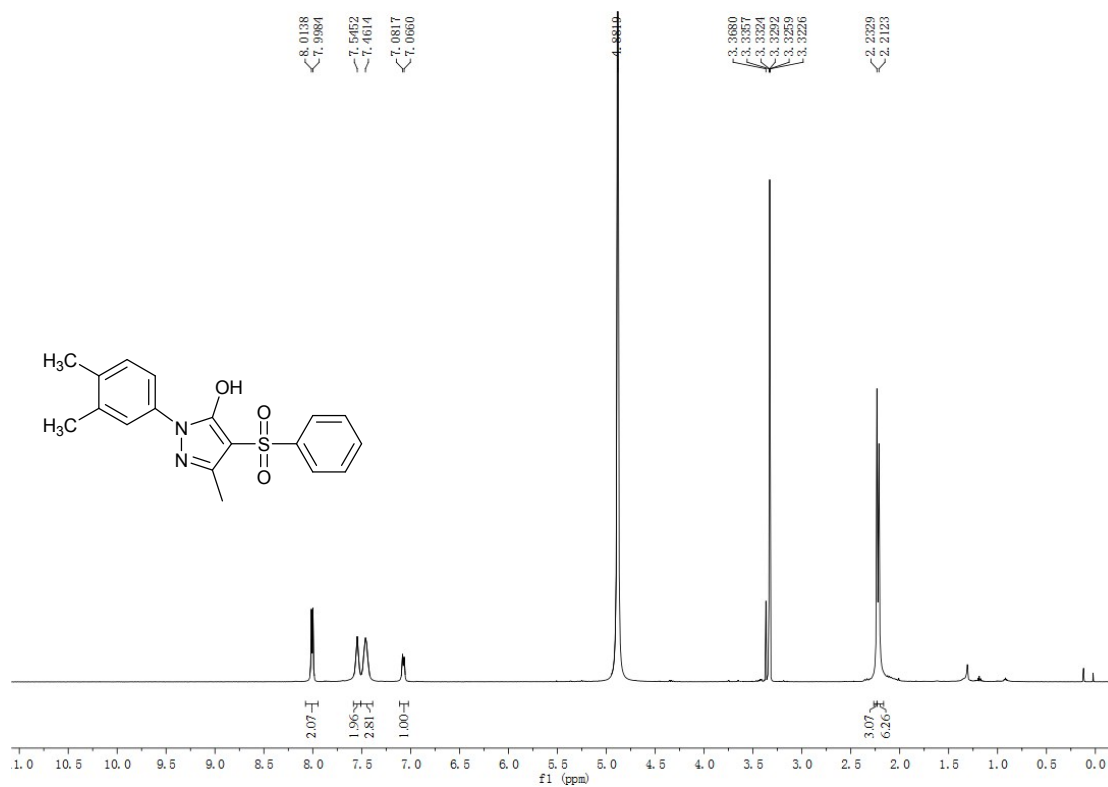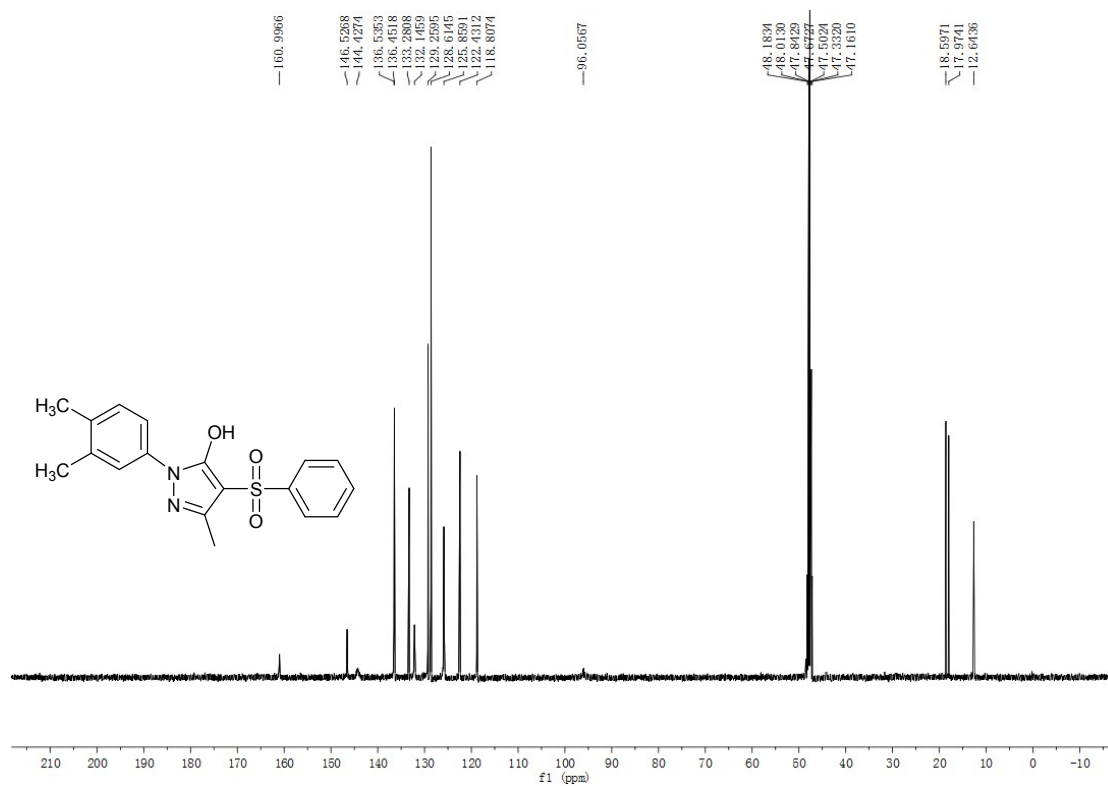

3ea

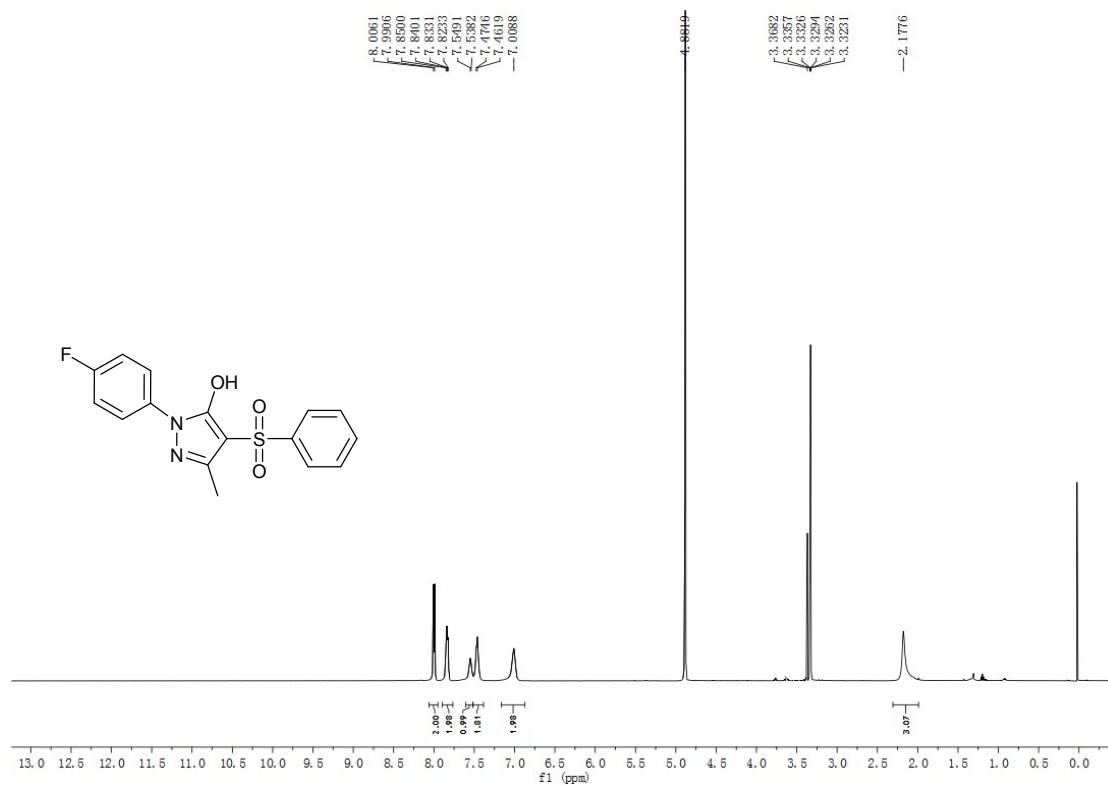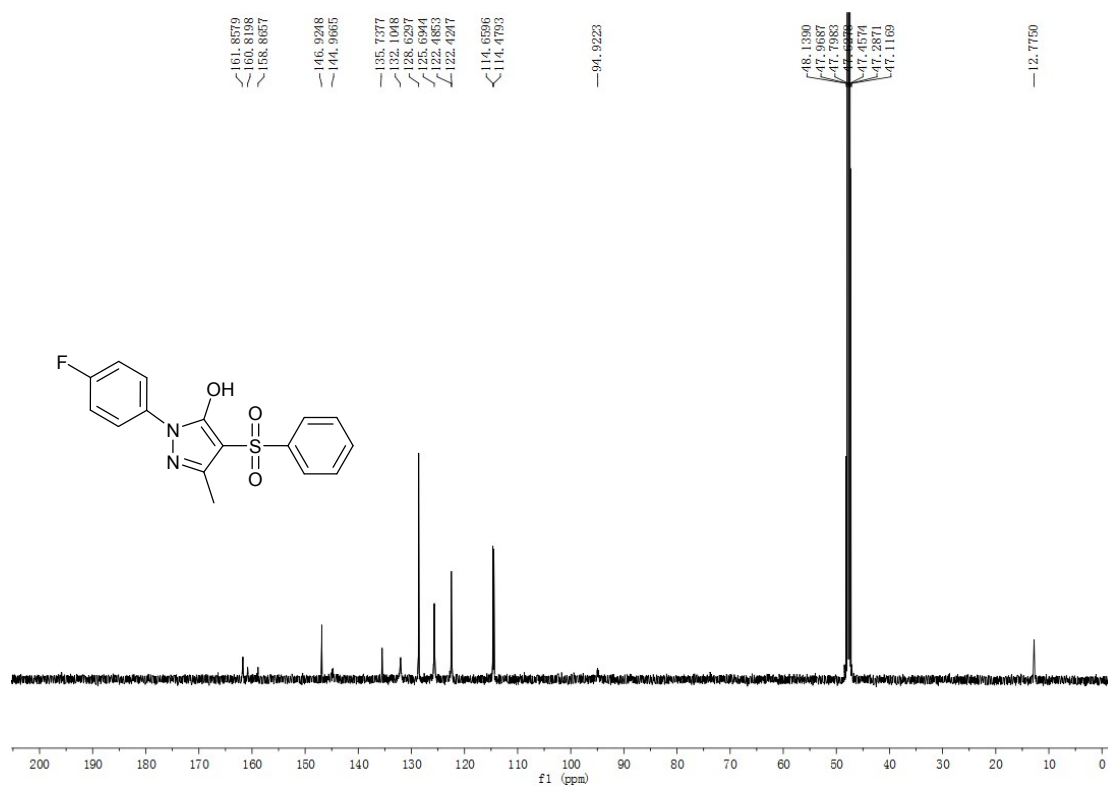

3fa

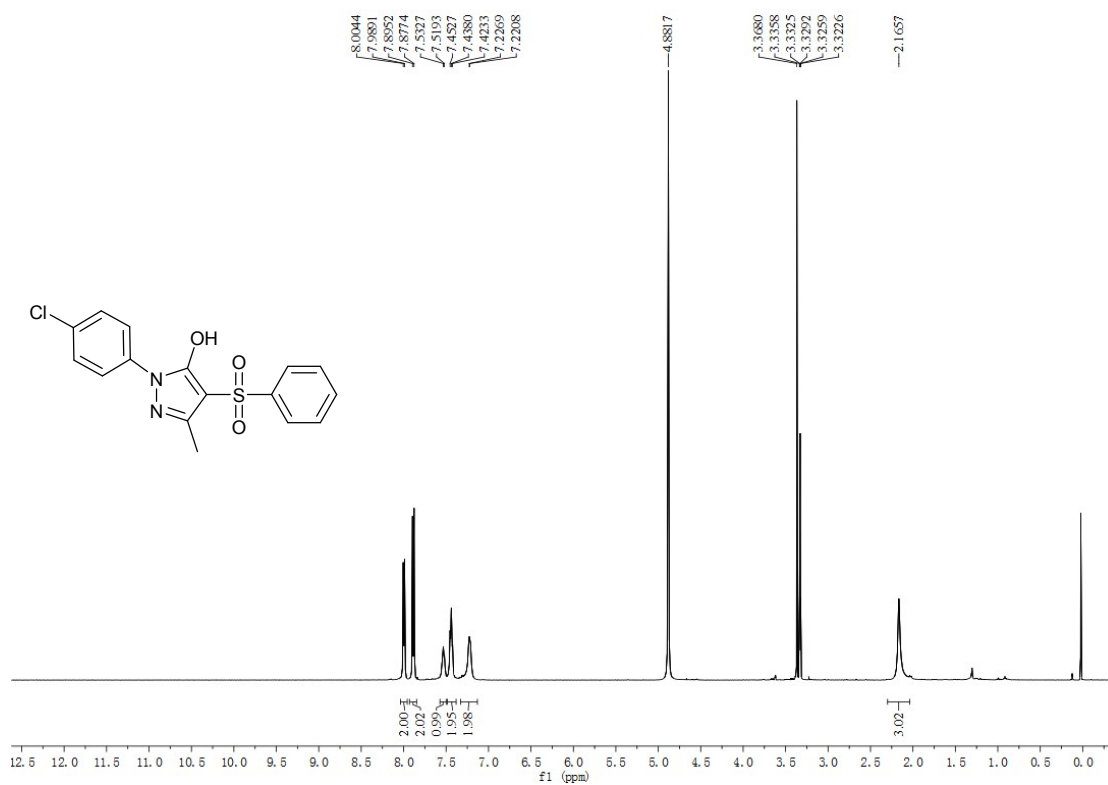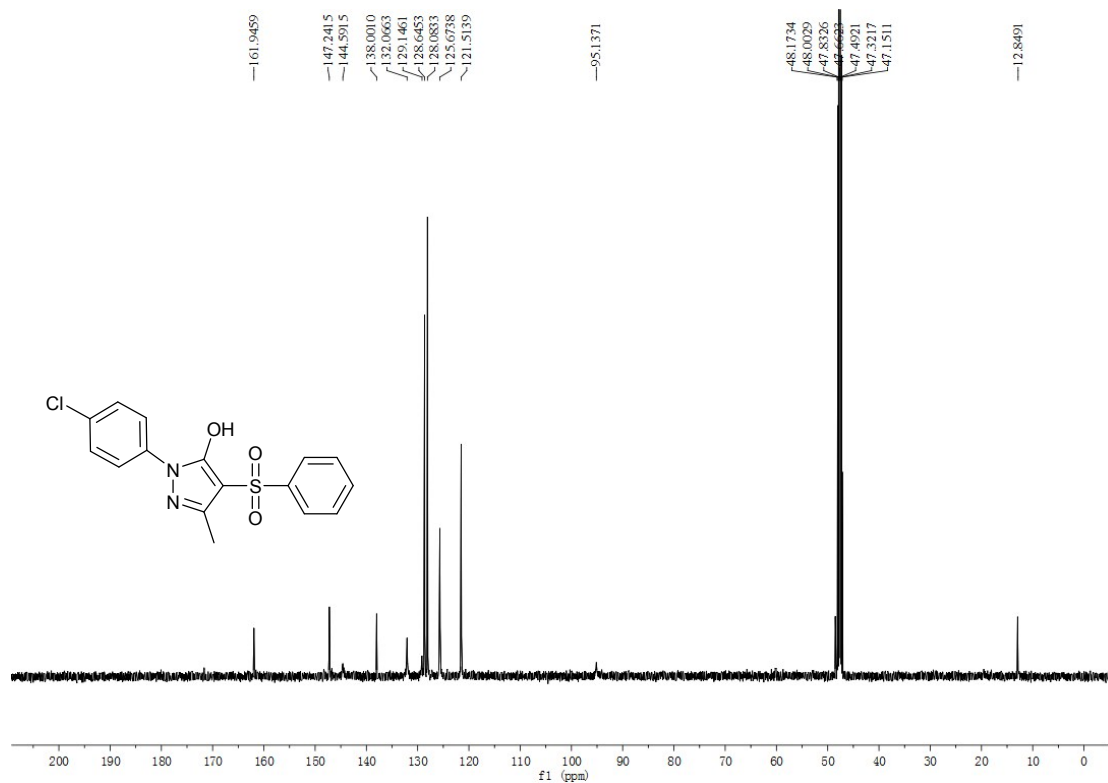

3b

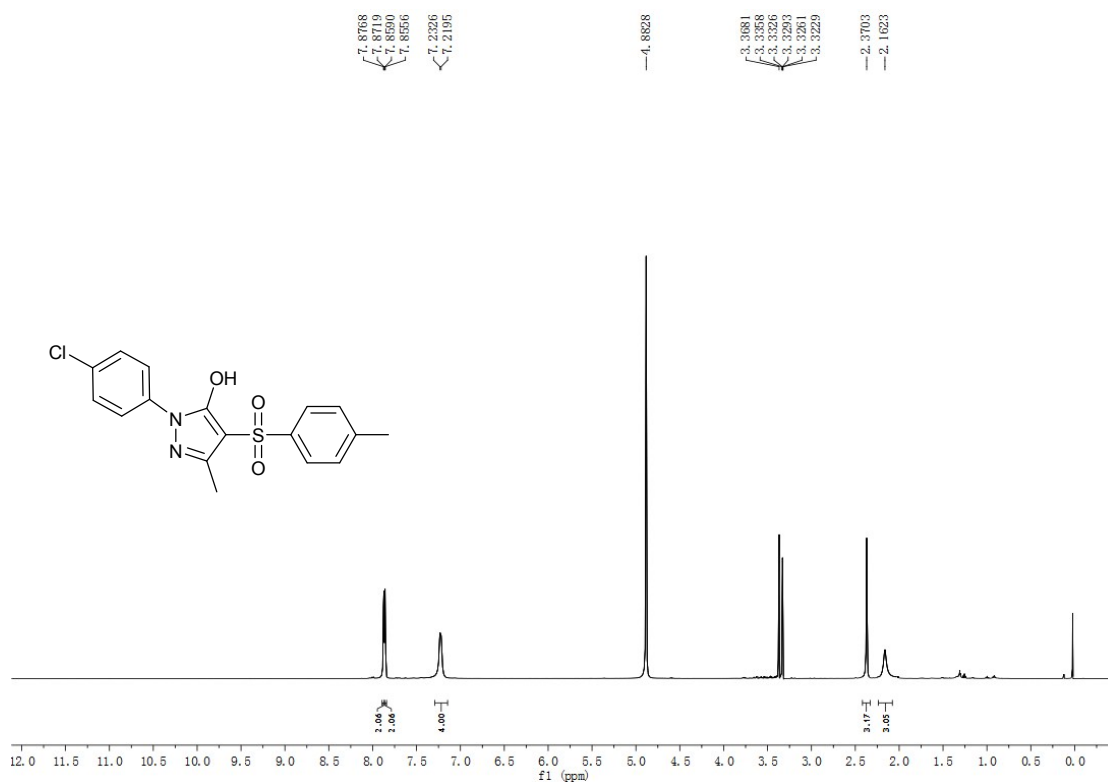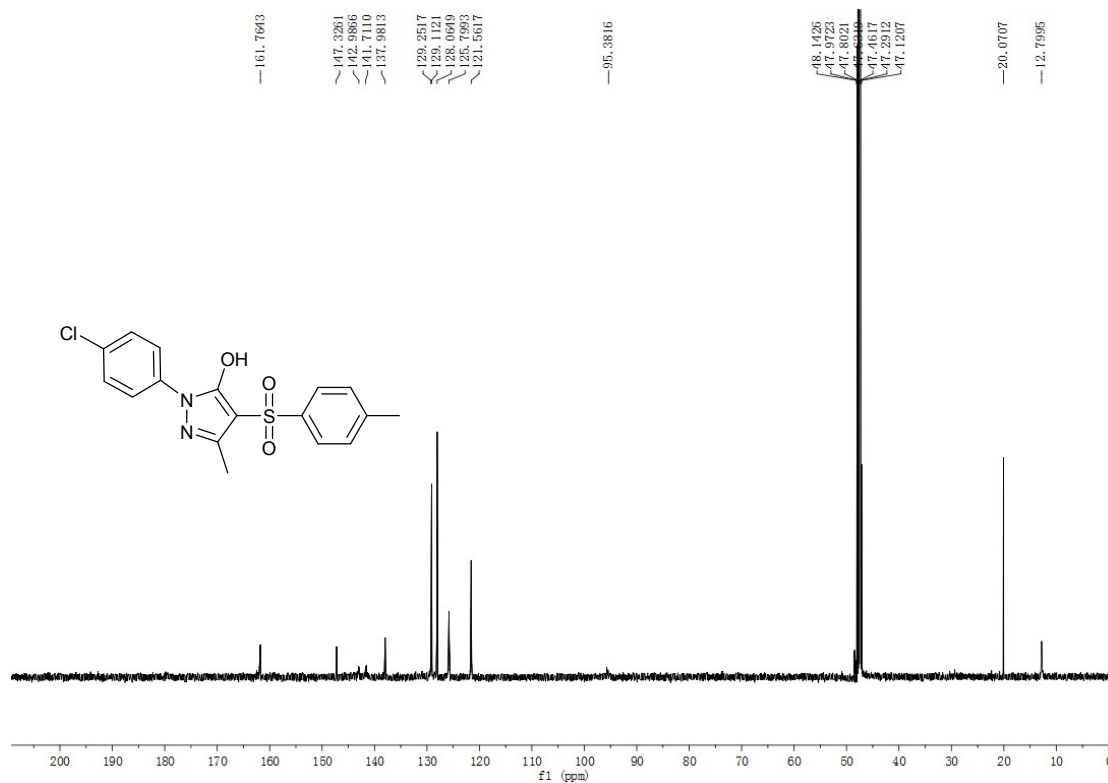

3ga

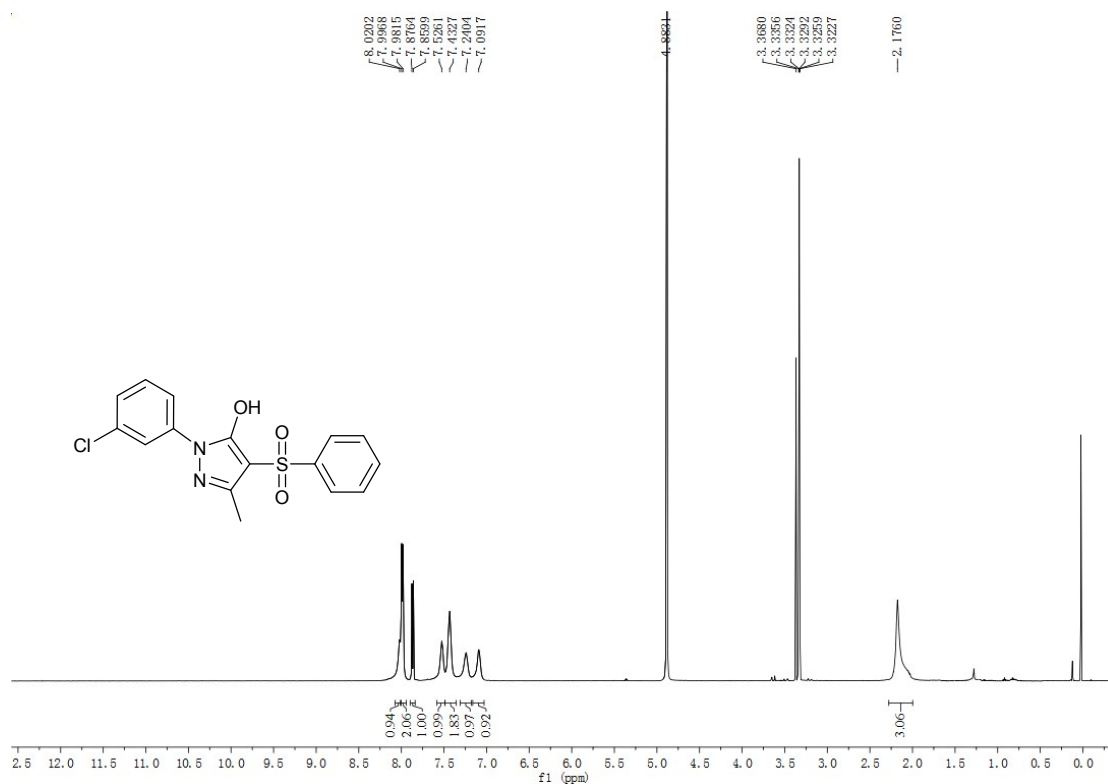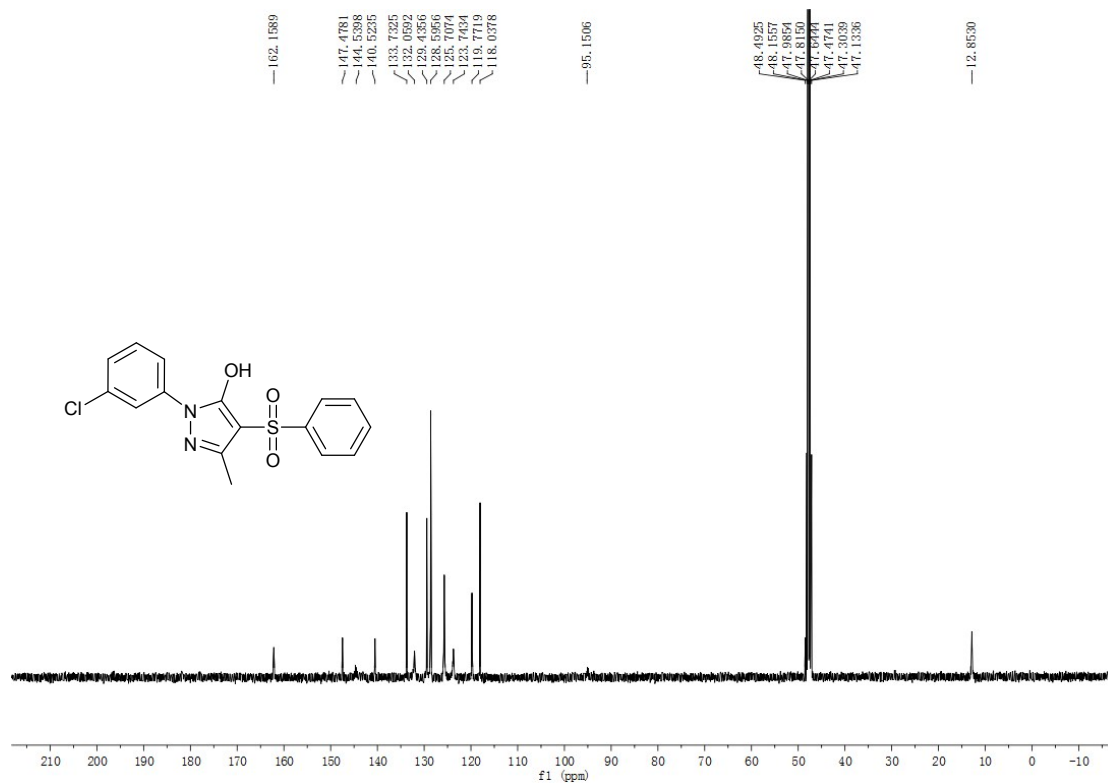

3ha

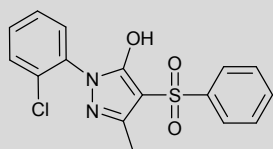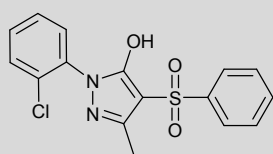



3bb

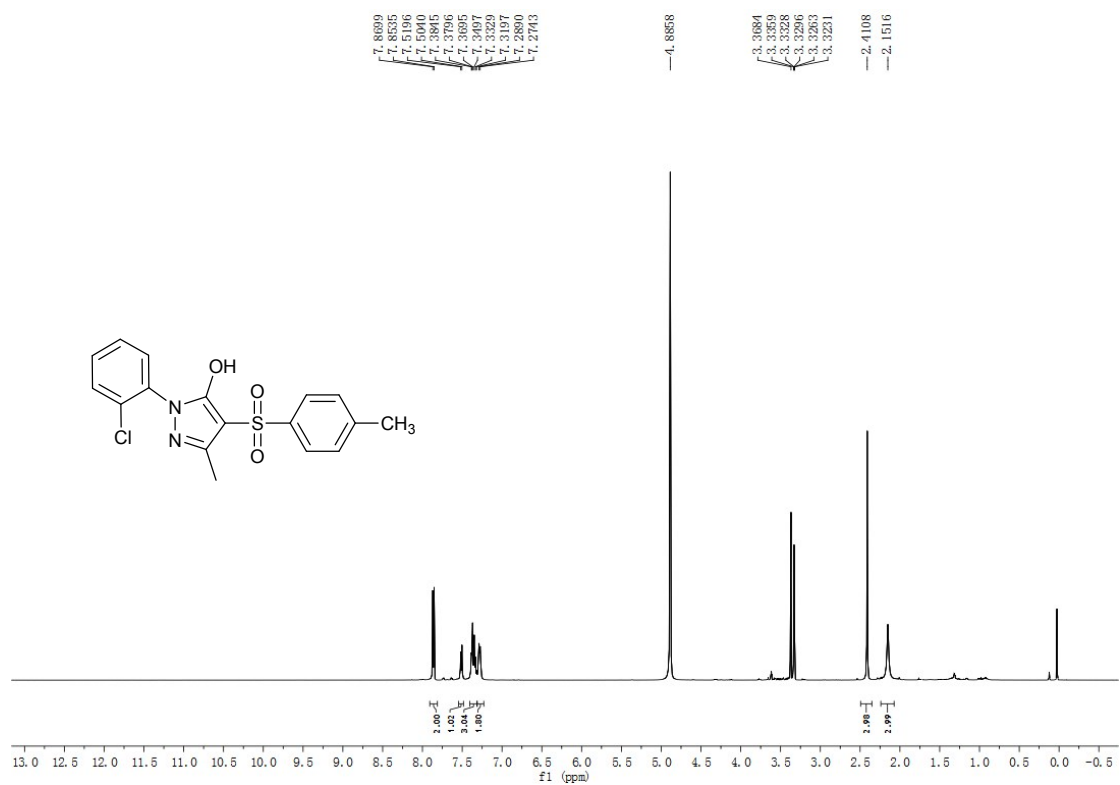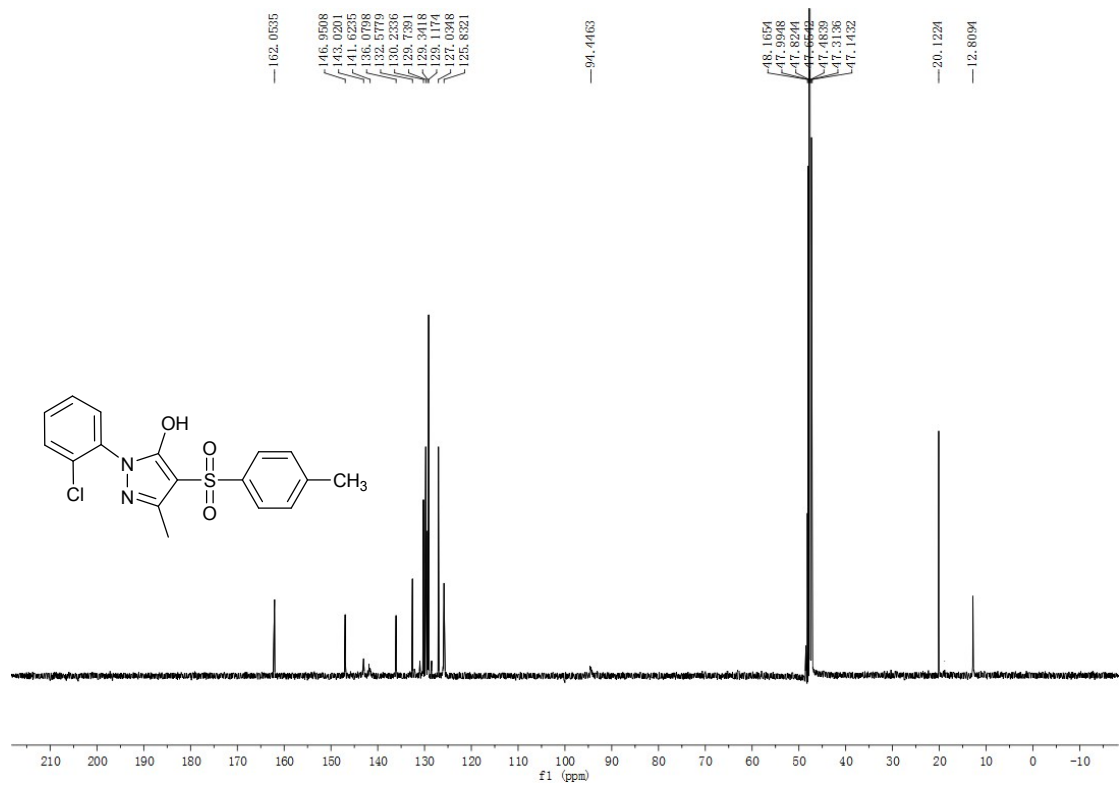

3ia

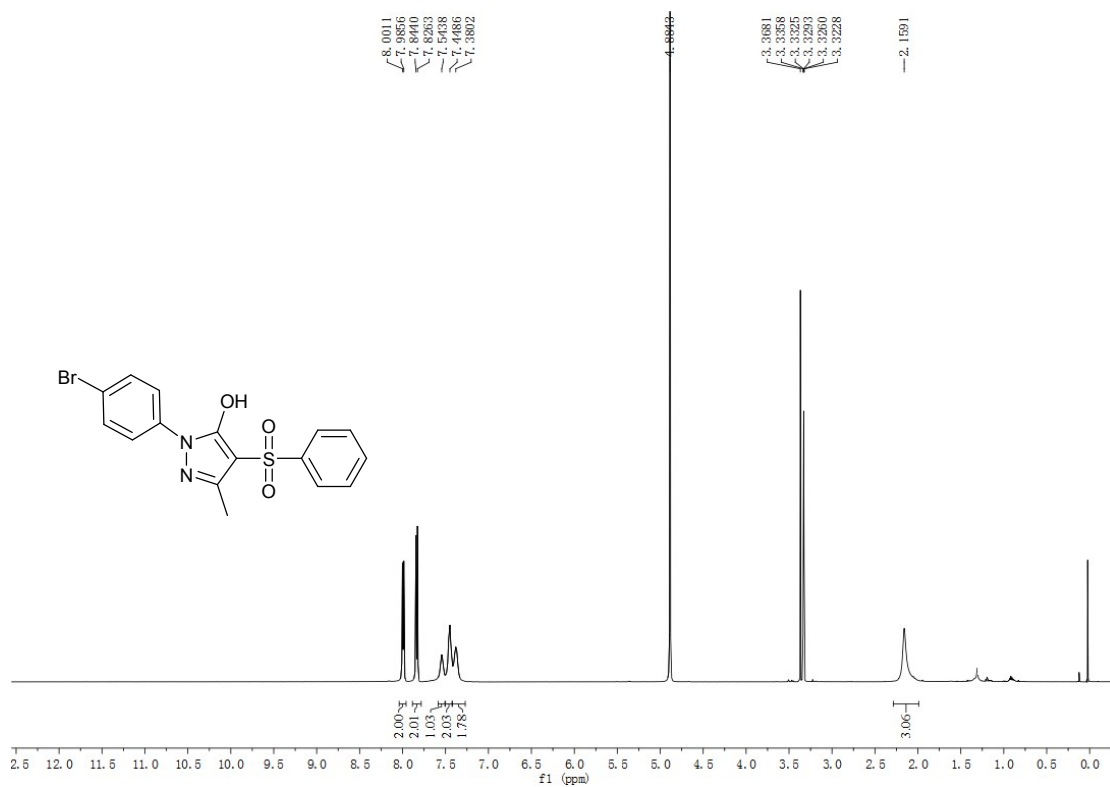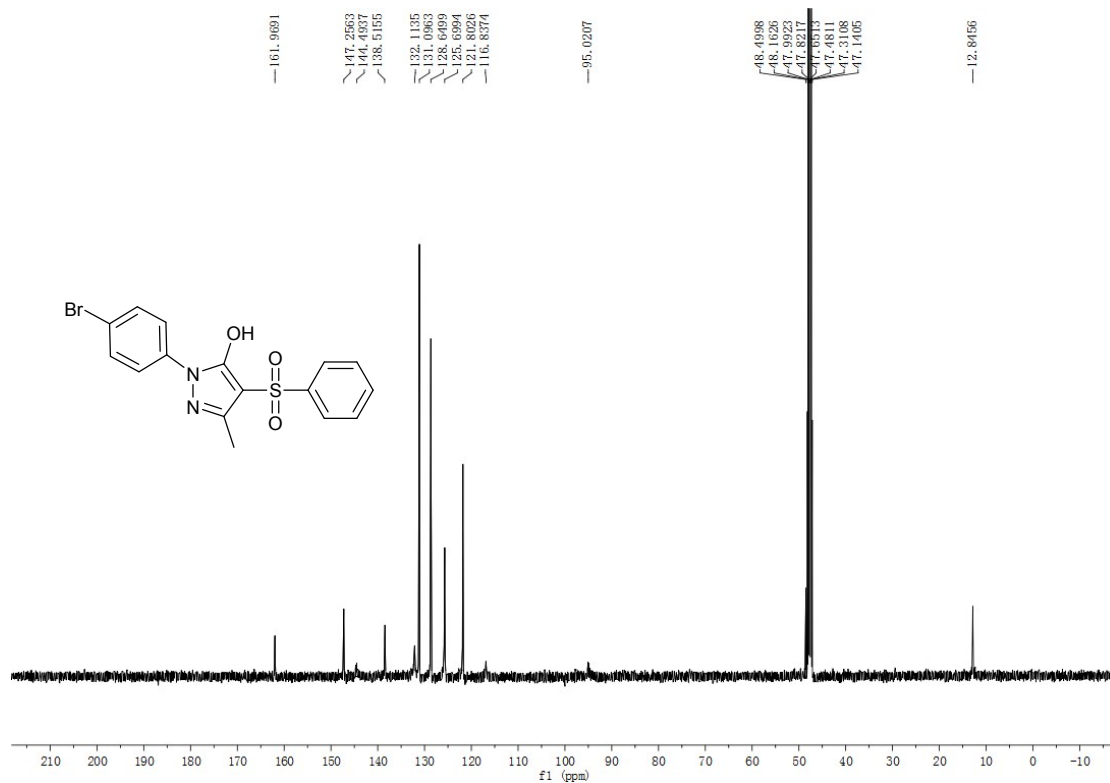

3ja

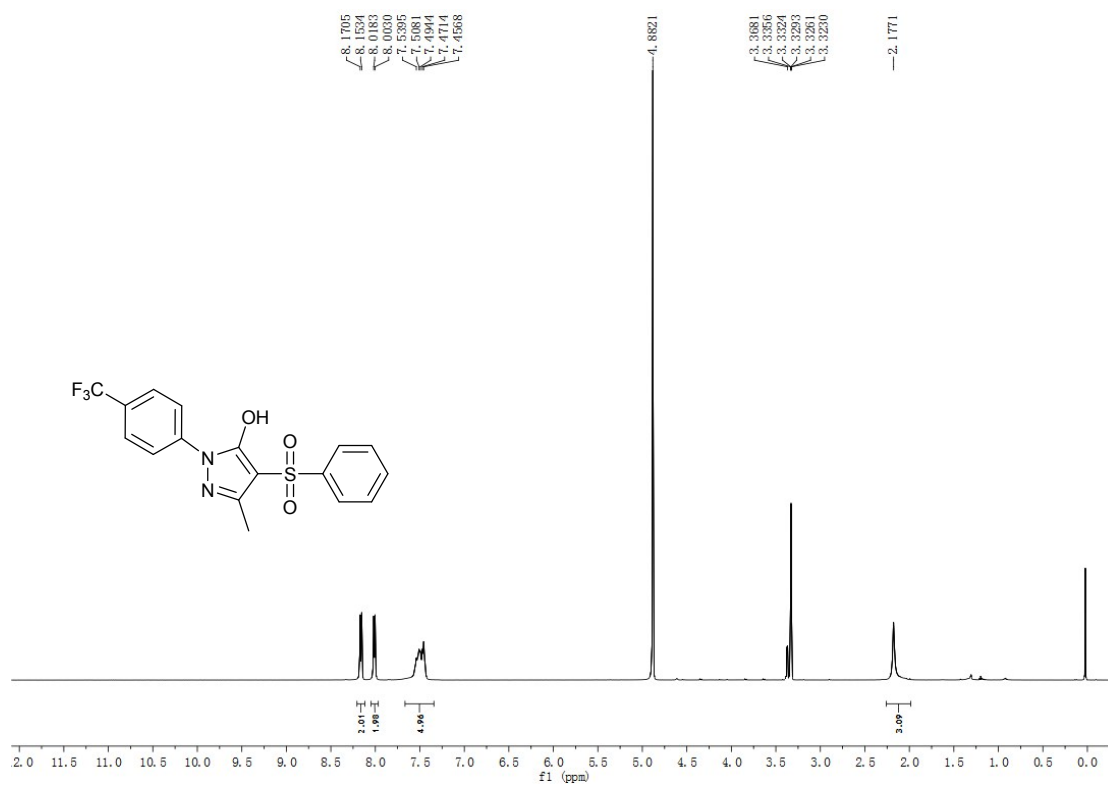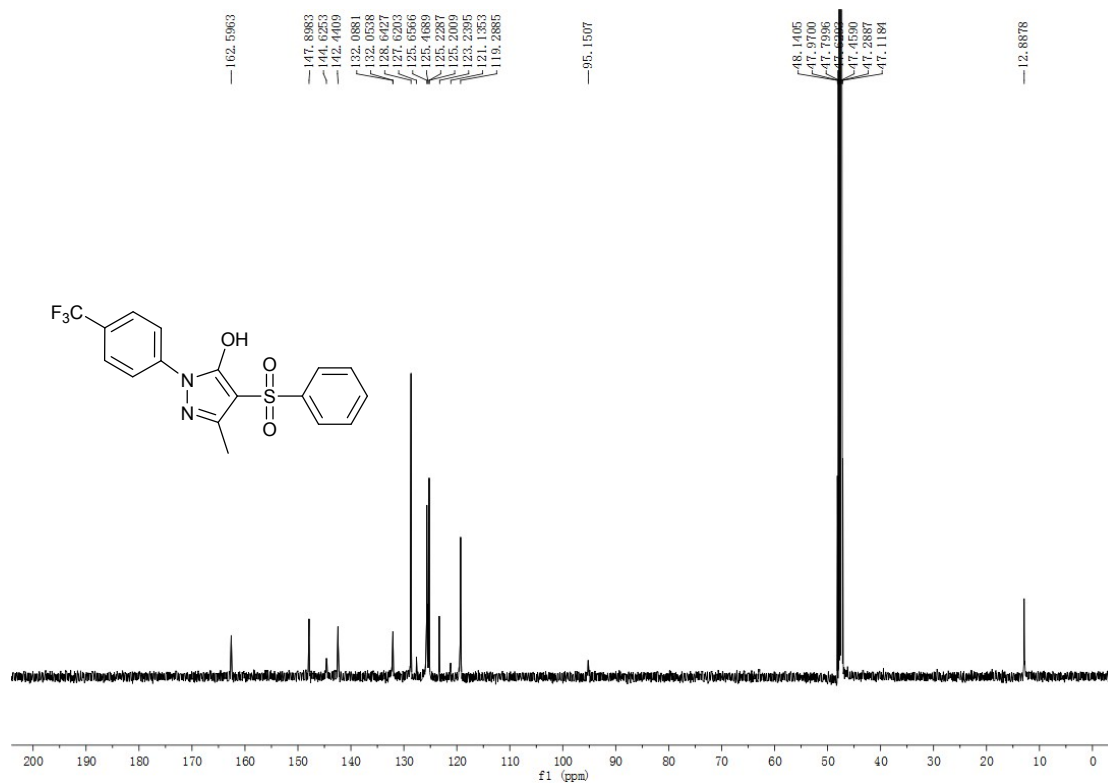

3ka

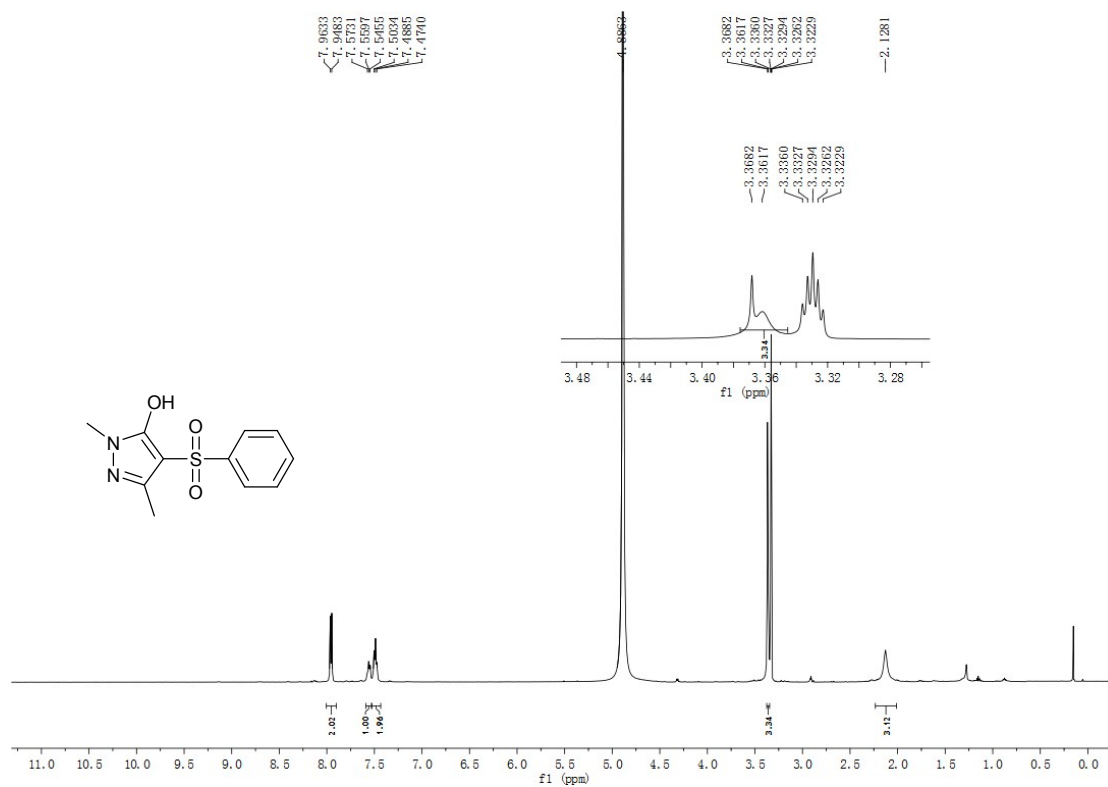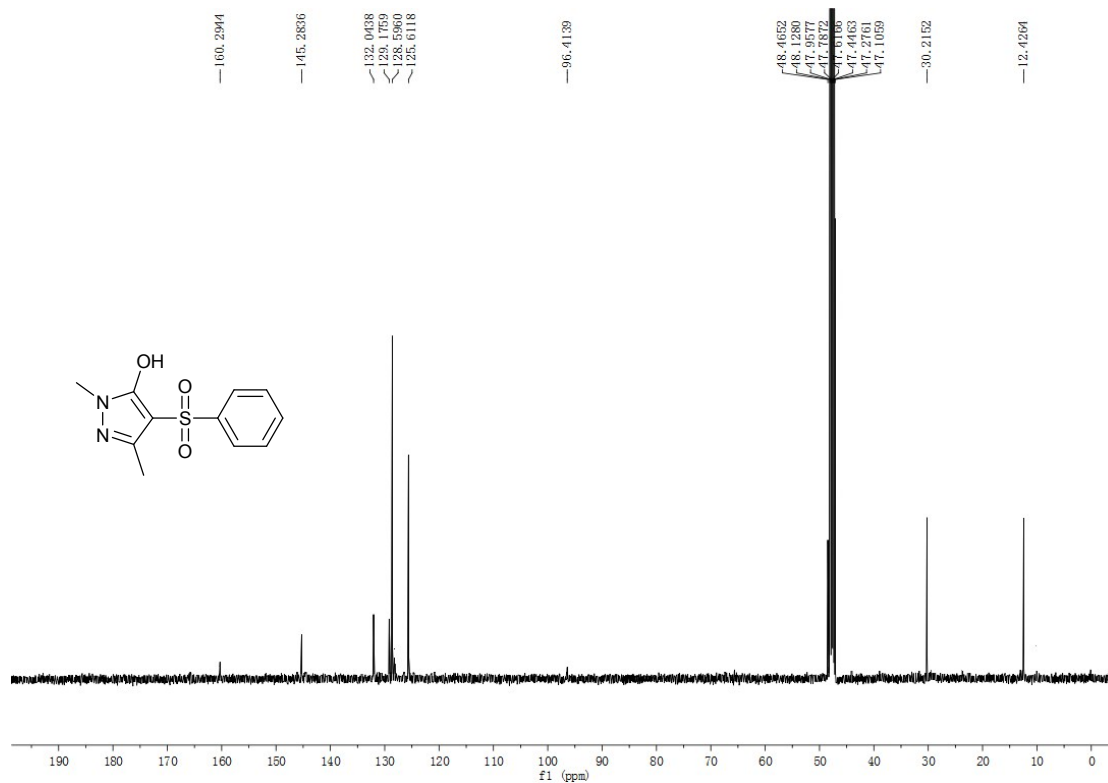

3la

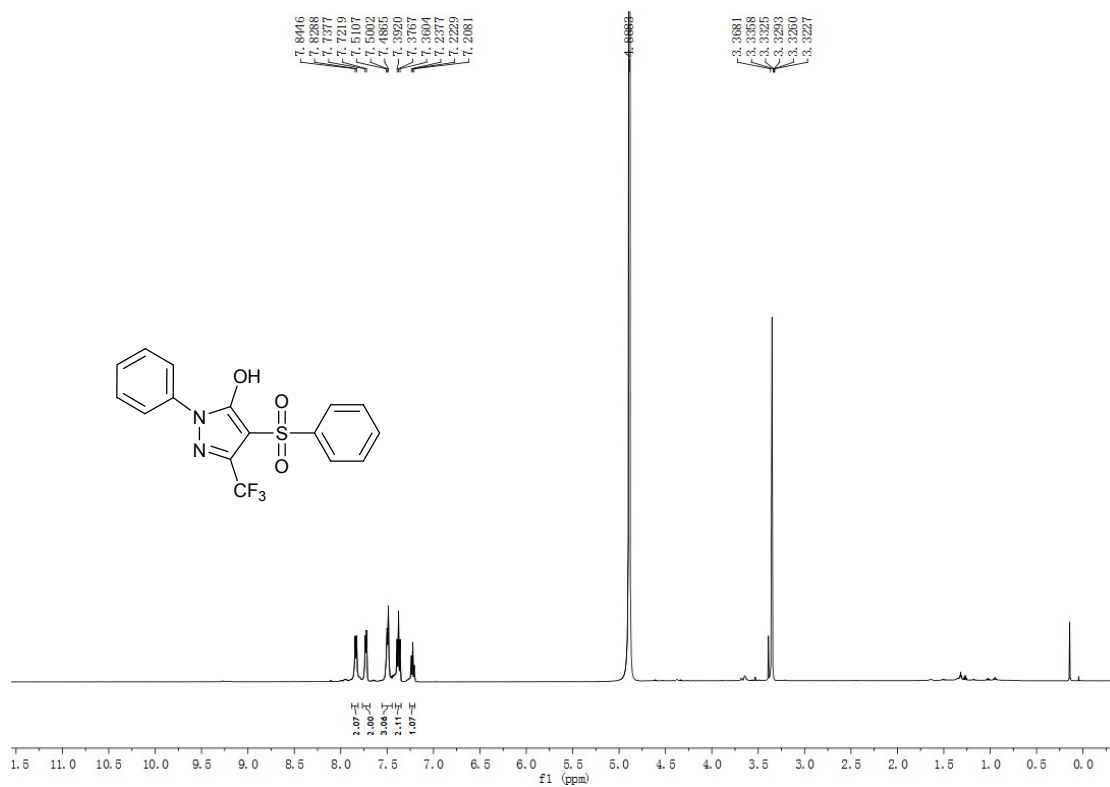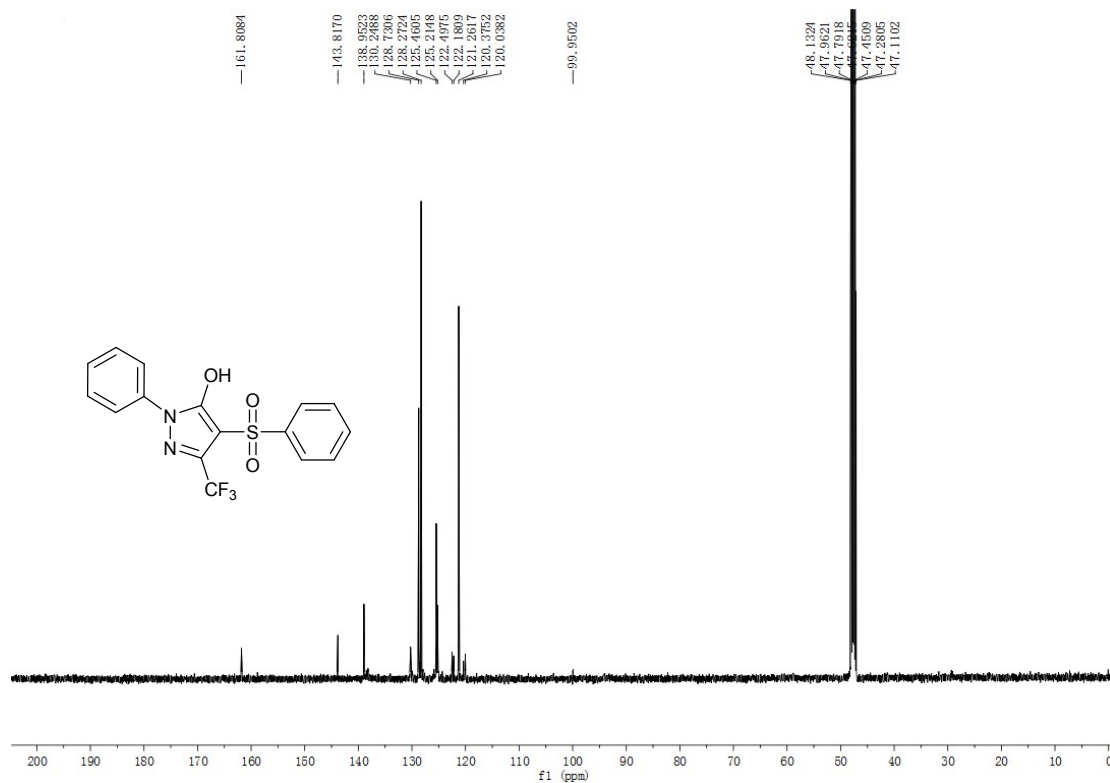

Supplement: c6qo00403b1.pdf [file c6qo00403b1.pdf]
